# Supplementary material for: An odorless, one-pot synthesis of nitroaryl thioethers via SNAr reactions through the in situ generation of S-alkylisothiouronium salts
Source: Royal Society of Chemistry journal article supplement (doi:10.1039/c4ra11490f), 2014-01-01

---

**Electronic Supplementary Information for**  
**An odorless, one-pot synthesis of nitroaryl thioethers *via* S<sub>N</sub>Ar**  
**reactions through the *in situ* generation of**  
***S*-alkylisothiuronium salts**

Guo-ping Lu\* and Chun Cai

Chemical Engineering College, Nanjing University of Science & Technology, Nanjing, Jiangsu 210094, P. R. China

\* Corresponding Author E-mail: [glu@njust.edu.cn](mailto:glu@njust.edu.cn)

|                                       |           |
|---------------------------------------|-----------|
| <b>1. Experimental</b>                | <b>2</b>  |
| <b>2. Characterization Data</b>       | <b>4</b>  |
| <b>3. NMR Spectra of All Products</b> | <b>11</b> |

## 1 Experimental

### 1.1 General

All chemical reagents are obtained from commercial suppliers and used without further purification. All known compounds are identified by appropriate technique such as mp,  $^1\text{H}$  NMR, and compared with previously reported data. All unknown compounds are characterized by  $^1\text{H}$  NMR,  $^{13}\text{C}$  NMR, MS and elemental analyses. Melting points were determined uncorrected. Analytical thin-layer chromatography are performed on glass plates precoated with silica gel impregnated with a fluorescent indicator (254 nm), and the plates are visualized by exposure to ultraviolet light. Mass spectra are taken on a Finnigan TSQ Quantum-MS instrument in the electrospray ionization (ESI) mode.  $^1\text{H}$  NMR and  $^{13}\text{C}$  NMR spectra are recorded on an AVANCE 500 Bruker spectrometer operating at 500 MHz and 125 MHz in  $\text{CDCl}_3$ , respectively, and chemical shifts are reported in ppm. Elemental analyses are performed on a Yanagimoto MT3CHN recorder. GC analyses are performed on an Agilent 7890A instrument (Column: Agilent 19091J-413: 30 m  $\times$  320  $\mu\text{m}$   $\times$  0.25  $\mu\text{m}$ , carrier gas:  $\text{H}_2$ , FID detection).

### 1.2 Experimental Procedure

**General procedures for the synthesis of nitroaryl thioethers from organic halides, thiourea and aryl fluorides in water:** A mixture of organic halide **1** 0.75 mmol, nitroaryl fluoride **2** 0.50 mmol, thiourea 1.50 mmol and base 1.50 mmol in 2 wt.% aqueous Triton X-100 solution (1.0 mL) is stirred at 40-80  $^\circ\text{C}$  for 8-24 h. Upon completion, the reaction mixture is diluted with EtOAc (4.0 mL), filtered through a bed of silica gel layered over Celite, The volatiles are removed in *vacuo* to afford the crude product. The extent of conversions is determined by GC. Sometimes, further column chromatography on silica gel affords the pure desired product **3**.

**General procedure for the synthesis of anilines **6**, **9** and **11** via a two-step one-pot process:** A mixture of organic halide 0.75 mmol, aryl fluoride 0.5 mmol, thiourea 1.5 mmol and  $\text{NEt}_3$  ( $\text{K}_2\text{CO}_3$  for **11**) 1.5 mmol in 2 wt.% aqueous Triton X-100 solution (1.0 mL) is stirred at 50  $^\circ\text{C}$  (80  $^\circ\text{C}$  for **11**) for 8-24 h. Upon completion, zinc powder 2.5 mmol and AcOH 2.5 mmol are employed in aqueous medium, and the mixture is allowed to stir at room temperature for another 8 h. Then, the reaction mixture is diluted with EtOAc (4.0 mL), filtered through a bed of silica gel layered over Celite, The volatiles are removed in *vacuo* to afford the crude product. The extent of conversions is determined by GC. Further column chromatography on silica gel affords the pure desired product.

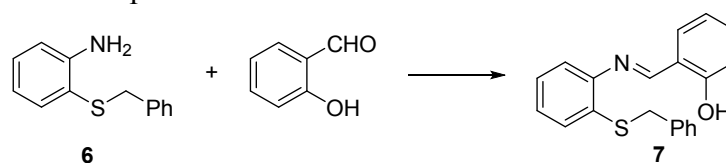

A mixture of **6** 0.50 mmol and salicylaldehyde 0.50 mmol in ethanol (1.0 mL) is

stirred at room temperature for 30 min. The solution is then kept undisturbed for 6 hours at room temperature. The yellow crystalline product **7** that formed was filtered off washed several times with ethanol and dried in a vacuum.

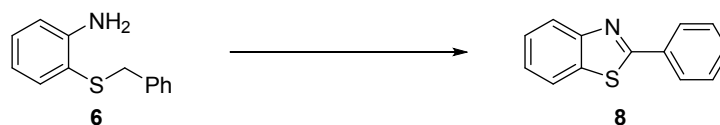

A mixture of **6** 0.50 mmol, FeBr<sub>2</sub> 0.05 mmol and DTBP 2.00 mmol in toluene is stirred at 110 °C for 16 h. Upon completion, the reaction mixture is diluted with EtOAc (4.0 mL), filtered through a bed of silica gel layered over Celite, The volatiles are removed in *vacuo* to afford the crude product. The extent of conversions is determined by GC. Further column chromatography on silica gel affords the pure desired product **8**.

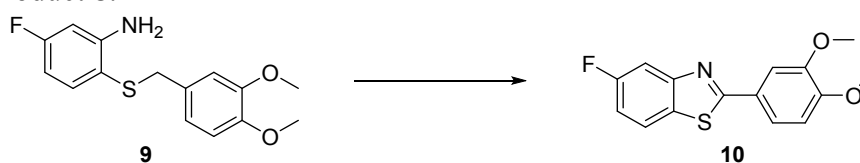

A mixture of **9** 0.50 mmol, FeBr<sub>2</sub> 0.05 mmol and DTBP 2.00 mmol in toluene (1 mL) is stirred at 110 °C for 16 h. Upon completion, the reaction mixture is diluted with EtOAc (4.0 mL), filtered through a bed of silica gel layered over Celite, The volatiles are removed in *vacuo* to afford the crude product. The extent of conversions is determined by GC. Further column chromatography on silica gel affords the pure desired product **10**.

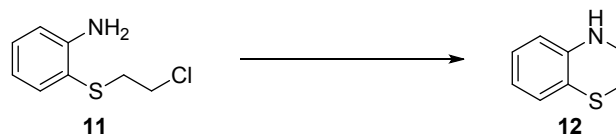

A mixture of **11** 0.50 mmol, NaI 0.60 mmol and K<sub>2</sub>CO<sub>3</sub> 1.00 mmol in DMF (1 mL) is stirred at 90 °C for 16 h. Upon completion, the reaction mixture is diluted with EtOAc (10.0 mL), and washed by water (10×3 mL). The collected organic phase is filtered through a bed of silica gel layered over Celite, and removed in *vacuo* to afford the product **12**.

## 2 Characterization Data

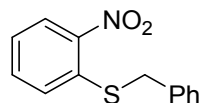

Chemical Formula: C<sub>13</sub>H<sub>11</sub>NO<sub>2</sub>S  
Mass: 245

Benzyl(2-nitrophenyl)sulfane **3a**, light yellow solid, mp: 82-84 °C (lit. 82-83).<sup>[1]</sup> <sup>1</sup>H NMR (CDCl<sub>3</sub>, 500 MHz) δ 4.19 (s, 2H), 7.22-7.24 (t, *J* = 7.5 Hz, 1H), 7.27-7.29 (t, *J* = 7.5 Hz, 1H), 7.32-7.35 (t, *J* = 7.5 Hz, 2H), 7.41 (d, *J* = 7.0 Hz, 2H), 7.44 (d, *J* = 7.5 Hz, 1H), 7.49-7.52 (t, *J* = 7.5 Hz, 1H), 8.19 (s, 1H). <sup>13</sup>C NMR (CDCl<sub>3</sub>, 125 MHz) δ 36.6, 123.8, 125.1, 126.0, 126.8, 127.9, 128.1, 132.7, 134.0, 136.9, 144.7. MS (ESI) *m/z*: 245 [M<sup>+</sup>].

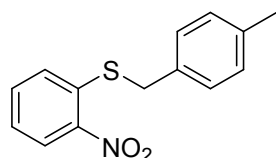

Chemical Formula: C<sub>14</sub>H<sub>13</sub>NO<sub>2</sub>S  
Mass: 259

(4-Methylbenzyl)(2-nitrophenyl)sulfane **3b**, light yellow solid, mp: 101-103 °C.<sup>[2]</sup> <sup>1</sup>H NMR (CDCl<sub>3</sub>, 500 MHz) δ 2.34 (s, 3H), 4.17 (s, 2H), 7.15 (d, *J* = 8.0 Hz, 2H), 7.23-7.26 (t, *J* = 7.5 Hz, 1H), 7.30 (d, *J* = 8.0 Hz, 2H), 7.46 (d, *J* = 8.0 Hz, 1H), 7.50-7.54 (t, *J* = 7.0 Hz, 1H), 8.20 (d, *J* = 8.0 Hz, 1H). <sup>13</sup>C NMR (CDCl<sub>3</sub>, 125 MHz) δ 20.2, 36.3, 123.7, 125.1, 126.0, 128.0, 128.5, 130.9, 132.6, 136.6, 137.1, 144.8. MS (ESI) *m/z*: 259 [M<sup>+</sup>].

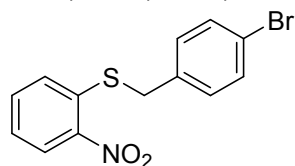

Chemical Formula: C<sub>13</sub>H<sub>10</sub>BrNO<sub>2</sub>S  
Mass: 323

(4-Bromobenzyl)(2-nitrophenyl)sulfane **3c**, light yellow solid, mp: 135-137 °C.<sup>[3]</sup> <sup>1</sup>H NMR (CDCl<sub>3</sub>, 500 MHz) δ 4.14 (s, 2H), 7.24-7.29 (m, 3H), 7.39 (d, *J* = 8.0 Hz, 1H), 7.44-7.45 (t, *J* = 6.5 Hz, 2H), 7.50-7.53 (t, *J* = 7.5 Hz, 1H), 8.18 (d, *J* = 8.0 Hz, 1H). <sup>13</sup>C NMR (CDCl<sub>3</sub>, 125 MHz) δ 36.0, 120.8, 124.0, 125.1, 126.1, 129.7, 131.0, 132.6, 133.2, 136.1, 145.0. MS (ESI) *m/z*: 323 [M<sup>+</sup>].

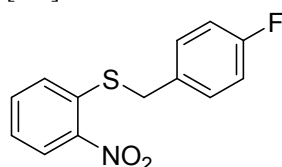

Chemical Formula: C<sub>13</sub>H<sub>10</sub>FNO<sub>2</sub>S  
Mass: 263  
Elemental Analysis: C, 59.30; H, 3.83;  
F, 7.22; N, 5.32; O, 12.15; S, 12.18

(4-Fluorobenzyl)(2-nitrophenyl)sulfane **3d**, light yellow solid, mp: 78-80 °C. <sup>1</sup>H NMR (CDCl<sub>3</sub>, 500 MHz) δ 4.17 (s, 2H), 7.01-7.04 (t, *J* = 8.5 Hz, 2H), 7.25-7.28 (m, 1H), 7.36-7.43 (m, 3H), 7.51-7.54 (m, 1H), 8.20 (d, *J* = 8.5 Hz, 1H). <sup>13</sup>C NMR (CDCl<sub>3</sub>, 125 MHz) δ 35.9, 114.8 (d, *J* = 21 Hz, 1C), 124.0, 125.1, 126.1, 129.6, 129.7, 132.5, 136.3, 145.1, 160.3-162.3 (d, *J* = 245 Hz, 1C). MS (ESI) *m/z*: 263 [M<sup>+</sup>]. Anal. Calcd for C<sub>13</sub>H<sub>10</sub>FNO<sub>2</sub>S: C, 59.30; H, 3.83%; N, 5.32%. Found: C, 59.51; H, 4.21%; N, 5.12%.

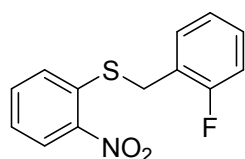

Chemical Formula: C<sub>13</sub>H<sub>10</sub>FNO<sub>2</sub>S  
Mass: 263  
Elemental Analysis: C, 59.30; H, 3.83;  
F, 7.22; N, 5.32; O, 12.15; S, 12.18

(2-Fluorobenzyl)(2-nitrophenyl)sulfane **3e**, light yellow solid, mp: 71-73 °C. <sup>1</sup>H NMR (CDCl<sub>3</sub>,

500 MHz)  $\delta$  4.24 (s, 2H), 7.06-7.13 (m, 2H), 7.26-7.30 (m, 2H), 7.42-7.47 (m, 2H), 7.53-7.56 (t,  $J = 7.5$  Hz, 1H), 8.20 (d,  $J = 8.5$  Hz, 1H).  $^{13}\text{C}$  NMR ( $\text{CDCl}_3$ , 125 MHz)  $\delta$  29.3, 114.6 (d,  $J = 22$  Hz, 1C), 121.3 (d,  $J = 14$  Hz, 1C), 123.5, 124.0, 125.1, 126.1, 128.6, 128.7, 130.0, 132.6, 136.2, 145.1, 159.0-160.9 (d,  $J = 246$  Hz, 1C). MS (ESI)  $m/z$ : 263 [ $\text{M}^+$ ]. Anal. Calcd for  $\text{C}_{13}\text{H}_{10}\text{FNO}_2\text{S}$ : C, 59.30; H, 3.83%; N, 5.32%. Found: C, 59.28; H, 3.60%; N, 5.44%.

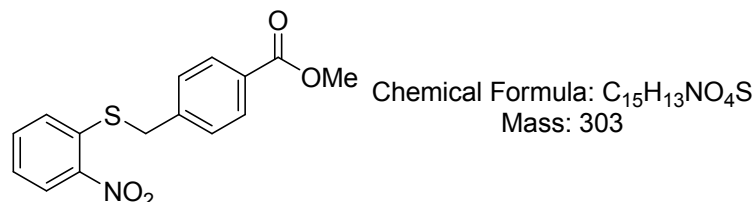

Methyl 4-((2-nitrophenylthio)methyl)benzoate **3f**, light yellow solid, mp: 141-143 °C.<sup>[4]</sup>  $^1\text{H}$  NMR ( $\text{CDCl}_3$ , 500 MHz)  $\delta$  3.91 (s, 3H), 4.23 (s, 2H), 7.25-7.28 (t,  $J = 7.5$  Hz, 1H), 7.39 (d,  $J = 8.0$  Hz, 1H), 7.48-7.52 (m, 3H), 8.99 (d,  $J = 8.0$  Hz, 2H), 8.19-8.20 (t,  $J = 8.0$  Hz, 1H).  $^{13}\text{C}$  NMR ( $\text{CDCl}_3$ , 125 MHz)  $\delta$  36.4, 51.2, 124.1, 125.1, 126.2, 128.0, 128.7, 129.1, 132.6, 136.8, 139.5, 145.2, 165.7. MS (ESI)  $m/z$ : 303 [ $\text{M}^+$ ].

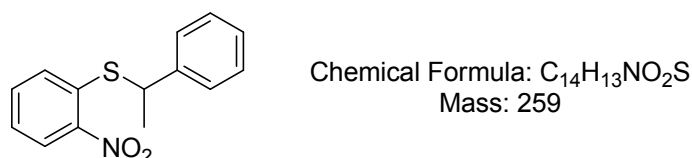

(2-Nitrophenyl)(1-phenylethyl)sulfane **3g**, light yellow solid, mp: 90-92 °C (lit. 91-93).<sup>[5]</sup>  $^1\text{H}$  NMR ( $\text{CDCl}_3$ , 500 MHz)  $\delta$  1.69 (d,  $J = 7.0$  Hz, 3H), 4.52-4.56 (q,  $J = 7.0$  Hz, 1H), 7.18-7.25 (m, 2H), 7.30-7.33 (t,  $J = 7.5$  Hz, 2H), 7.37-7.44 (m, 4H), 8.06 (d,  $J = 8.5$  Hz, 1H).  $^{13}\text{C}$  NMR ( $\text{CDCl}_3$ , 125 MHz)  $\delta$  22.0, 45.1, 124.2, 124.6, 126.2, 126.6, 127.8, 128.2, 131.9, 134.8, 141.2, 146.3. MS (ESI)  $m/z$ : 259 [ $\text{M}^+$ ].

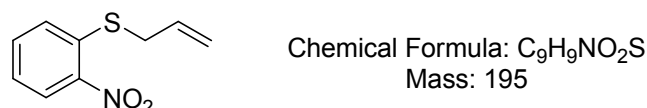

Allyl(2-nitrophenyl)sulfane **3h**, light yellow oil.<sup>[6]</sup>  $^1\text{H}$  NMR ( $\text{CDCl}_3$ , 500 MHz)  $\delta$  3.58 (d,  $J = 7.0$  Hz, 2H), 5.17 (d,  $J = 10.0$  Hz, 1H), 5.30 (d,  $J = 17.5$  Hz, 1H), 5.80-5.88 (m, 1H), 7.18-7.21 (m, 1H), 7.36 (d,  $J = 8.0$  Hz, 1H), 7.46-7.49 (m, 1H), 8.12-8.14 (m, 1H).  $^{13}\text{C}$  NMR ( $\text{CDCl}_3$ , 125 MHz)  $\delta$  34.6, 118.5, 123.7, 125.1, 126.2, 130.8, 132.3, 136.1, 145.4. MS (ESI)  $m/z$ : 195 [ $\text{M}^+$ ].

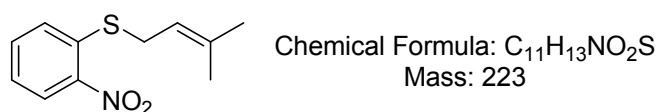

(3-Methylbut-2-enyl)(2-nitrophenyl)sulfane **3i**, light yellow oil.<sup>[7]</sup>  $^1\text{H}$  NMR ( $\text{CDCl}_3$ , 500 MHz)  $\delta$  1.74 (s, 3H), 1.76 (s, 3H), 3.59 (d,  $J = 7.5$  Hz, 2H), 5.29-5.32 (t,  $J = 7.5$  Hz, 1H), 7.22-7.25 (t,  $J = 7.5$  Hz, 1H), 7.41 (d,  $J = 8.0$  Hz, 1H), 7.52-7.55 (m, 1H), 8.19 (d,  $J = 8.5$  Hz, 1H).  $^{13}\text{C}$  NMR ( $\text{CDCl}_3$ , 125 MHz)  $\delta$  17.0, 24.7, 30.0, 115.9, 123.4, 125.1, 126.1, 132.4, 137.5, 137.8, 145.0. MS (ESI)  $m/z$ : 223 [ $\text{M}^+$ ].

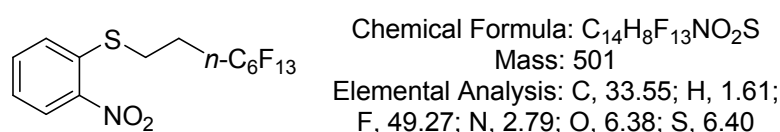

(2-Nitrophenyl)(3,3,4,4,5,5,6,6,7,7,8,8,8-tridecafluorooctyl)sulfane **3j**, light yellow oil.  $^1\text{H}$  NMR

(CDCl<sub>3</sub>, 500 MHz)  $\delta$  2.46 (m, 2H), 3.22-3.25 (m, 2H), 7.34-7.37 (m, 1H), 7.41 (d,  $J$  = 8.0 Hz, 1H), 7.63-7.66 (m, 1H), 8.24-8.26 (m, 1H). <sup>13</sup>C NMR (CDCl<sub>3</sub>, 125 MHz)  $\delta$  22.1, 29.2-29.5 (m), 49.9, 124.4, 125.2, 125.4, 132.9, 134.4, 145.6. <sup>19</sup>F NMR (CDCl<sub>3</sub>, 470 MHz)  $\delta$  -126.1, -123.3, -122.8, -121.8, -114.2, -80.8. MS (ESI)  $m/z$ : 501 [M<sup>+</sup>]. Anal. Calcd for C<sub>14</sub>H<sub>8</sub>F<sub>13</sub>NO<sub>2</sub>S: C, 33.55; H, 1.61%; N, 2.79%. Found: C, 33.19; H, 1.94%; N, 3.13%.

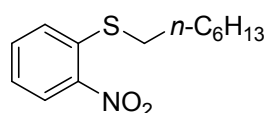

Chemical Formula: C<sub>13</sub>H<sub>19</sub>NO<sub>2</sub>S

Mass: 253

Elemental Analysis: C, 61.63; H, 7.56; N, 5.53; O, 12.63; S, 12.66

Heptyl(2-nitrophenyl)sulfane **3k**, light yellow oil. <sup>1</sup>H NMR (CDCl<sub>3</sub>, 500 MHz)  $\delta$  0.87-0.90 (t,  $J$  = 7.0 Hz, 3H), 1.28-1.37 (m, 6H), 1.45-1.50 (m, 2H), 1.71-1.77 (m, 2H), 2.94-2.97 (t,  $J$  = 7.5 Hz, 2H), 7.23-7.26 (m, 1H), 7.40 (d,  $J$  = 8.0 Hz, 1H), 7.53-7.55 (m, 1H), 8.19-8.21 (m, 1H). <sup>13</sup>C NMR (CDCl<sub>3</sub>, 125 MHz)  $\delta$  13.0, 21.6, 26.9, 27.9, 28.1, 30.7, 31.4, 123.3, 125.1, 125.6, 132.3, 137.3, 145.1. MS (ESI)  $m/z$ : 253 [M<sup>+</sup>]. Anal. Calcd for C<sub>13</sub>H<sub>19</sub>NO<sub>2</sub>S: C, 61.63; H, 7.56%; N, 5.53%. Found: C, 61.59; H, 7.87%; N, 5.14%.

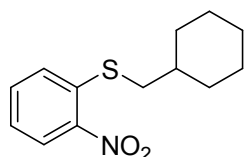

Chemical Formula: C<sub>13</sub>H<sub>17</sub>NO<sub>2</sub>S

Mass: 251

Elemental Analysis: C, 62.12; H, 6.82; N, 5.57; O, 12.73; S, 12.76

(Cyclohexylmethyl)(2-nitrophenyl)sulfane **3l**, light yellow oil. <sup>1</sup>H NMR (CDCl<sub>3</sub>, 500 MHz)  $\delta$  0.97-1.05 (m, 2H), 1.10-1.23 (m, 3H), 1.57-1.69 (m, 4H), 1.87-1.90 (m, 2H), 2.76 (d,  $J$  = 8.5 Hz, 2H), 7.14-7.17 (t,  $J$  = 7.5 Hz, 1H), 7.32 (d,  $J$  = 8.0 Hz, 1H), 7.45-7.48 (t,  $J$  = 8.0 Hz, 1H), 8.11 (d,  $J$  = 8.0 Hz, 1H). <sup>13</sup>C NMR (CDCl<sub>3</sub>, 125 MHz)  $\delta$  25.0, 25.2, 32.2, 35.8, 38.7, 123.2, 125.1, 125.7, 132.3, 137.6, 145.2. MS (ESI)  $m/z$ : 251 [M<sup>+</sup>]. Anal. Calcd for C<sub>13</sub>H<sub>17</sub>NO<sub>2</sub>S: C, 62.12%; H, 6.82%; N, 5.57%. Found: C, 61.91; H, 6.56%; N, 5.38%.

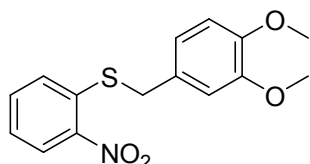

Chemical Formula: C<sub>15</sub>H<sub>15</sub>NO<sub>4</sub>S

Mass: 305

Elemental Analysis: C, 59.00; H, 4.95; N, 4.59; O, 20.96; S, 10.50

(3,4-Dimethoxybenzyl)(2-nitrophenyl)sulfane **3m**, light yellow solid, mp: 96-98 °C. <sup>1</sup>H NMR (CDCl<sub>3</sub>, 500 MHz)  $\delta$  3.87 (s, 6H), 4.16 (s, 2H), 6.79-6.84 (d,  $J$  = 8.0 Hz, 1H), 6.93-6.96 (m, 2H), 7.24-7.27 (m, 1H), 7.45-7.54 (m, 2H), 8.19 (d,  $J$  = 8.5 Hz, 1H). <sup>13</sup>C NMR (CDCl<sub>3</sub>, 125 MHz)  $\delta$  37.7, 56.0 (2C), 111.4, 112.2, 121.5, 124.9, 126.1, 127.2, 127.3, 133.6, 137.9, 146.1, 148.8, 149.3. MS(ESI)  $m/z$ : 305 [M<sup>+</sup>]. Anal. Calcd for C<sub>15</sub>H<sub>15</sub>NO<sub>4</sub>S: C, 59.00%; H, 4.95%; N, 4.59%. Found: C, 59.32; H, 4.56%; N, 4.97%.

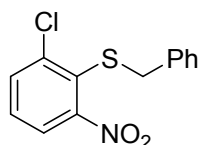

Chemical Formula: C<sub>13</sub>H<sub>10</sub>ClNO<sub>2</sub>S

Mass: 279

Benzyl(2-chloro-6-nitrophenyl)sulfane **3n**, light yellow solid, mp: 86-88 °C.<sup>[8]</sup> <sup>1</sup>H NMR (CDCl<sub>3</sub>, 500 MHz)  $\delta$  4.12 (s, 2H), 7.17-7.19 (m, 2H), 7.22-7.24 (m, 3H), 7.34-7.37 (t,  $J$  = 8.0 Hz, 1H), 7.42-7.44 (m, 1H), 7.61-7.63 (m, 1H). <sup>13</sup>C NMR (CDCl<sub>3</sub>, 125 MHz)  $\delta$  39.1, 120.5, 125.8, 126.7, 127.6, 128.1, 129.1, 131.7, 135.2, 141.1, 155.6. MS (ESI)  $m/z$ : 279 [M<sup>+</sup>].

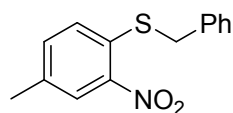

Chemical Formula:  $C_{14}H_{13}NO_2S$   
Mass: 259

Benzyl(4-methyl-2-nitrophenyl)sulfane **3o**, light yellow solid, mp: 94-96 °C (lit. 96-98 °C).<sup>[9]</sup>  $^1H$  NMR ( $CDCl_3$ , 500 MHz)  $\delta$  2.40 (s, 3H), 4.19 (s, 2H), 7.28-7.36 (m, 5H), 7.42 (d,  $J = 7.5$  Hz, 2H), 8.02 (s, 1H).  $^{13}C$  NMR ( $CDCl_3$ , 125 MHz)  $\delta$  19.5, 36.7, 125.2, 126.2, 126.7, 127.8, 128.1, 132.9, 133.5, 134.3, 134.4, 145.1. MS (ESI)  $m/z$ : 259 [ $M^+$ ].

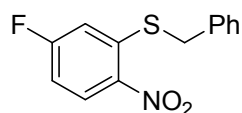

Chemical Formula:  $C_{13}H_{10}FNO_2S$   
Mass: 263  
Elemental Analysis: C, 59.30; H, 3.83;  
F, 7.22; N, 5.32; O, 12.15; S, 12.18

Benzyl(5-fluoro-2-nitrophenyl)sulfane **3p** light yellow solid, mp: 74-76 °C.  $^1H$  NMR ( $CDCl_3$ , 500 MHz)  $\delta$  4.17 (s, 2H), 6.91-6.94 (m, 1H), 7.14-7.16 (dd,  $J = 9.5, 2.0$  Hz, 1H), 7.30-7.44 (m, 5H), 8.28-8.31 (dd,  $J = 9.0, 5.5$  Hz, 1H).  $^{13}C$  NMR ( $CDCl_3$ , 125 MHz)  $\delta$  36.7, 110.9-111.1 (d,  $J = 24$  Hz, 1C), 112.2-112.5 (d,  $J = 28$  Hz, 1C), 127.0, 128.0, 128.1, 133.2, 140.6, 141.1, 163.2-165.2 (d,  $J = 258$  Hz, 1C). MS(ESI)  $m/z$ : 263 [ $M^+$ ]. Anal. Calcd for  $C_{13}H_{10}NO_2S$ : C, 59.30%; H, 3.83%, N, 5.32%. Found: C, 59.08; H, 4.12%; N, 5.26%.

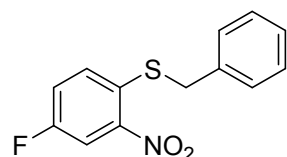

Chemical Formula:  $C_{13}H_{10}FNO_2S$   
Mass: 263

Benzyl(4-fluoro-2-nitrophenyl)sulfane **3q**, light yellow solid, mp: 76-78 °C.<sup>[10]</sup>  $^1H$  NMR ( $CDCl_3$ , 500 MHz)  $\delta$  4.19 (s, 2H), 7.25-7.43 (m, 7H), 7.89-7.92 (dd,  $J = 8.5, 3.0$  Hz, 1H).  $^{13}C$  NMR ( $CDCl_3$ , 125 MHz)  $\delta$  38.12, 113.2-113.4 (d,  $J = 26$  Hz, 1C), 121.3-121.5 (d,  $J = 23$  Hz, 1C), 128.0, 129.0, 129.1, 129.3, 132.7, 135.0, 146.8, 158.5-160.5 (d,  $J = 248$  Hz, 1C). MS(ESI)  $m/z$ : 263 [ $M^+$ ].

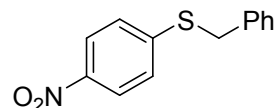

Chemical Formula:  $C_{13}H_{11}NO_2S$   
Mass: 245

Benzyl(4-nitrophenyl)sulfane **3r**, light yellow solid, mp: 120-122 °C (lit. 123 °C).<sup>[11]</sup>  $^1H$  NMR ( $CDCl_3$ , 500 MHz)  $\delta$  4.05 (s, 2H), 7.29-7.35 (m, 5H), 7.39 (d,  $J = 7.5$  Hz, 2H), 8.09 (d,  $J = 9.0$  Hz, 2H).  $^{13}C$  NMR ( $CDCl_3$ , 125 MHz)  $\delta$  36.1, 122.9, 125.7, 126.8, 127.7, 127.9, 134.5, 144.3, 146.2. MS (ESI)  $m/z$ : 245 [ $M^+$ ].

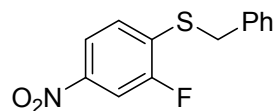

Chemical Formula:  $C_{13}H_{10}FNO_2S$   
Mass: 263

Benzyl(2-fluoro-4-nitrophenyl)sulfane **3s**, light yellow solid, mp: 122-124 °C (lit. 126 °C).<sup>[10]</sup>  $^1H$  NMR ( $CDCl_3$ , 500 MHz)  $\delta$  4.25 (s, 2H), 7.18-7.38 (m, 6H), 7.87-7.90 (dd,  $J = 9.5$  Hz, 2.5 Hz, 1H), 7.92-7.94 (dd,  $J = 8.5, 2.0$  Hz, 1H).  $^{13}C$  NMR ( $CDCl_3$ , 125 MHz)  $\delta$  35.6, 109.7-109.9 (d,  $J = 26$  Hz, 1C), 118.0, 126.9, 127.4, 127.5, 133.5, 133.6, 134.2, 145.1, 157.0-159.0 (d,  $J = 248$  Hz, 1C). MS (ESI)  $m/z$ : 263 [ $M^+$ ].

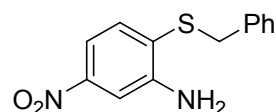

Chemical Formula:  $C_{13}H_{12}N_2O_2S$   
Mass: 260

2-(Benzylthio)-5-nitroaniline **3t**, light yellow solid, mp: 158-160 °C.<sup>[12]</sup>  $^1H$  NMR ( $CDCl_3$ , 500

MHz)  $\delta$  4.03 (s, 2H), 4.50 (br s, 2H), 7.18-7.20 (t,  $J = 6.0$  Hz, 2H), 7.24-7.30 (m, 4H), 7.44-7.46 (dd,  $J = 8.5, 2.5$  Hz, 1H), 7.51 (d,  $J = 2.5$  Hz, 1H).  $^{13}\text{C}$  NMR ( $\text{CDCl}_3$ , 125 MHz)  $\delta$  37.8, 107.6, 111.7, 125.0, 126.6, 127.6, 127.5, 133.6, 136.0, 146.9, 147.4. MS (ESI)  $m/z$ : 260 [ $\text{M}^+$ ].

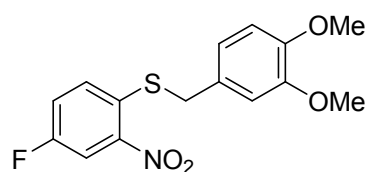

Chemical Formula:  $\text{C}_{15}\text{H}_{14}\text{FNO}_4\text{S}$   
 Mass: 323  
 Elemental Analysis: C, 55.72; H, 4.36;  
 F, 5.88; N, 4.33; O, 19.79; S, 9.92

(3,4-Dimethoxybenzyl)(5-fluoro-2-nitrophenyl)sulfane **3w**, light yellow solid, mp: 92-94 °C.  $^1\text{H}$  NMR ( $\text{CDCl}_3$ , 500 MHz)  $\delta$  3.97 (s, 6H), 4.25 (s, 2H), 6.91 (d,  $J = 8.0$  Hz, 1H), 7.02-7.03 (m, 2H), 7.36-7.40 (m, 1H), 7.52-7.55 (dd,  $J = 9.0, 5.0$  Hz, 1H), 7.98-8.01 (dd,  $J = 8.5, 3.0$  Hz, 1H).  $^{13}\text{C}$  NMR ( $\text{CDCl}_3$ , 125 MHz)  $\delta$  37.0, 54.9 (2C), 110.3, 111.0, 112.0-112.2 (d,  $J = 26$  Hz, 1C), 120.1, 120.2-120.4 (d,  $J = 25$  Hz, 1C), 126.1, 128.3, 131.7, 145.7, 147.8, 148.3, 157.4-159.4 (d,  $J = 248$  Hz, 1C). MS(ESI)  $m/z$ : 323 [ $\text{M}^+$ ]. Anal. Calcd for  $\text{C}_{15}\text{H}_{14}\text{FNO}_4\text{S}$ : C, 55.72%; H, 4.36%, N, 4.33%. Found: C, 56.01; H, 3.97%; N, 4.14%.

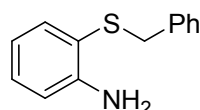

Chemical Formula:  $\text{C}_{13}\text{H}_{13}\text{NS}$   
 Mass: 215

2-(Benzylthio)aniline **6**, light green solid, mp: 48-50 °C (lit. 45-46 °C).<sup>[13]</sup>  $^1\text{H}$  NMR ( $\text{CDCl}_3$ , 500 MHz)  $\delta$  3.93 (s, 2H), 4.19 (br s, 2H), 6.64-6.67 (t,  $J = 7.5$  Hz, 1H), 6.72 (d,  $J = 8.0$  Hz, 1H), 7.12-7.19 (m, 3H), 7.24-7.29 (m, 4H).  $^{13}\text{C}$  NMR ( $\text{CDCl}_3$ , 125 MHz)  $\delta$  38.7, 113.9, 116.5, 117.5, 126.1, 127.4, 127.9, 129.1, 135.5, 137.4, 147.6. MS (ESI)  $m/z$ : 215 [ $\text{M}^+$ ].

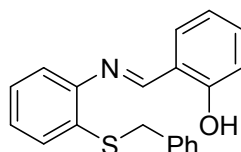

Chemical Formula:  $\text{C}_{20}\text{H}_{17}\text{NOS}$   
 Mass: 319

(*E*)-2-((2-(Benzylthio)phenyl)imino)methylphenol **7**, yellow solid, mp: 218-220 °C.<sup>[13]</sup>  $^1\text{H}$  NMR ( $\text{CDCl}_3$ , 500 MHz)  $\delta$  4.12 (s, 2H), 6.93-6.96 (t,  $J = 7.5$  Hz, 1H), 7.05 (d,  $J = 8.5$  Hz, 1H), 7.14-7.40 (m, 10H), 8.54 (s, 1H), 13.19 (s, 1H).  $^{13}\text{C}$  NMR ( $\text{CDCl}_3$ , 125 MHz)  $\delta$  36.8, 116.5, 116.8, 118.0, 118.3, 125.9, 126.2, 126.3, 127.5, 127.9, 128.1, 131.3, 131.5, 132.4, 135.9, 146.2, 160.2, 161.1. MS (ESI)  $m/z$ : 319 [ $\text{M}^+$ ].

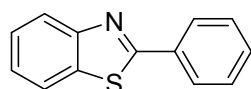

Chemical Formula:  $\text{C}_{13}\text{H}_9\text{NS}$   
 Mass: 211

2-Phenylbenzo[*d*]thiazole **8**, white solid, mp: 112-114 °C (lit. 115 °C).<sup>[14]</sup>  $^1\text{H}$  NMR ( $\text{CDCl}_3$ , 500 MHz)  $\delta$  7.40-7.43 (t,  $J = 7.5$  Hz, 1H), 7.50-7.53 (m, 4H), 7.92 (d,  $J = 8.0$  Hz, 4H), 8.09-8.13 (m, 3H).  $^{13}\text{C}$  NMR ( $\text{CDCl}_3$ , 125 MHz)  $\delta$  120.6, 122.3, 124.2, 125.3, 126.6, 128.0, 130.0, 132.7, 134.1, 153.2, 167.1. MS (ESI)  $m/z$ : 211 [ $\text{M}^+$ ].

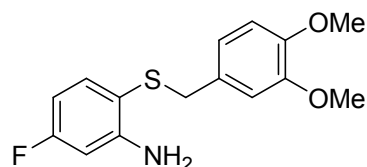

Chemical Formula:  $\text{C}_{15}\text{H}_{16}\text{FNO}_2\text{S}$   
 Mass: 293  
 Elemental Analysis: C, 61.41; H, 5.50;  
 F, 6.48; N, 4.77; O, 10.91; S, 10.93

2-(3,4-Dimethoxybenzylthio)-4-fluoroaniline **9**, light yellow oil.  $^1\text{H}$  NMR ( $\text{CDCl}_3$ , 500 MHz)  $\delta$



3.69 (s, 3H), 3.72 (s, 2H), 3.76 (s, 3H), 4.42 (s, 2H), 6.23-6.27 (m, 1H), 6.31-6.33 (dd,  $J = 10.5$ , 2.5 Hz, 1H), 6.51 (d,  $J = 1.5$  Hz, 1H), 6.58-6.60 (dd,  $J = 8.0$ , 1.0 Hz, 1H), 6.67 (d,  $J = 8.0$  Hz, 1H), 7.04-7.07 (m, 1H).  $^{13}\text{C}$  NMR ( $\text{CDCl}_3$ , 125 MHz)  $\delta$  39.6, 55.7, 55.9, 101.1-101.3 (d,  $J = 25$  Hz, 1C), 105.1-105.2 (d,  $J = 21$  Hz, 1C), 111.2, 112.2-112.3 (d,  $J = 23$  Hz, 1C), 121.1, 130.9, 138.7, 138.8, 150.6-150.7 (d,  $J = 10$  Hz, 1C), 163.4-165.4 (d,  $J = 244$  Hz, 1C). MS(ESI)  $m/z$ : 293 [ $\text{M}^+$ ]. Anal. Calcd for  $\text{C}_{15}\text{H}_{16}\text{FNO}_2\text{S}$ : C, 61.41%; H, 5.50%, N, 4.77%. Found: C, 61.13; H, 5.22%; N, 4.38%.

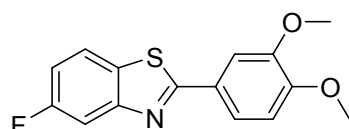

Chemical Formula:  $\text{C}_{15}\text{H}_{12}\text{FNO}_2\text{S}$   
Mass: 289

2-(3,4-Dimethoxyphenyl)-5-fluorobenzo[d]thiazole **10**, white solid, mp: 108-110 °C (lit. 110 °C).<sup>[15]</sup>  $^1\text{H}$  NMR ( $\text{CDCl}_3$ , 500 MHz)  $\delta$  3.94 (s, 3H), 4.01 (s, 3H), 6.91 (d,  $J = 8.5$  Hz, 1H), 7.09-7.13 (m, 1H), 7.55-7.57 (dd,  $J = 8.5$ , 2.0 Hz, 1H), 7.67-7.71 (m, 2H), 7.75-7.78 (dd,  $J = 9.0$ , 5.0 Hz, 1H).  $^{13}\text{C}$  NMR ( $\text{CDCl}_3$ , 125 MHz)  $\delta$  56.1, 56.2, 109.0-109.2 (d,  $J = 24$  Hz, 1C), 109.9, 111.1, 113.4-113.6 (d,  $J = 25$  Hz, 1C), 121.3, 122.1-122.2 (d,  $J = 9$  Hz, 1C), 126.5, 130.4, 149.5, 151.9, 155.1-155.2 (d,  $J = 11$  Hz, 1C), 161.1-163.0 (d,  $J = 243$  Hz, 1C), 170.5. MS(ESI)  $m/z$ : 289 [ $\text{M}^+$ ].

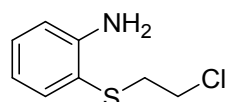

Chemical Formula:  $\text{C}_8\text{H}_{10}\text{ClNS}$   
Mass: 187

2-(2-Chloroethylthio)aniline **11**, light green oil.<sup>[16]</sup>  $^1\text{H}$  NMR ( $\text{CDCl}_3$ , 500 MHz)  $\delta$  3.04-3.07 (t,  $J = 7.5$  Hz, 2H), 3.58-3.61 (t,  $J = 8.0$  Hz, 2H), 4.19 (br s, 2H), 6.70-6.77 (m, 2H), 7.16-7.19 (m, 1H), 7.40-7.42 (dd,  $J = 7.5$ , 1.5 Hz, 1H).  $^{13}\text{C}$  NMR ( $\text{CDCl}_3$ , 125 MHz)  $\delta$  35.8, 41.8, 114.2, 114.7, 117.7, 129.6, 135.7, 147.7. MS (ESI)  $m/z$ : 187 [ $\text{M}^+$ ].

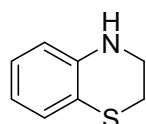

Chemical Formula:  $\text{C}_8\text{H}_9\text{NS}$   
Mass: 151

3,4-Dihydro-2H-benzo[b][1,4]thiazine **12**, light yellow oil.<sup>[16]</sup>  $^1\text{H}$  NMR ( $\text{CDCl}_3$ , 500 MHz)  $\delta$  3.06-3.08 (m, 2H), 3.61-3.64 (m, 2H), 4.00 (br, 1H), 6.47-6.49 (dd,  $J = 8.0$ , 1.0 Hz, 1H), 6.64-6.67 (m, 1H), 6.91-6.94 (m, 1H), 7.02-7.04 (dd,  $J = 7.5$ , 1.0 Hz, 1H).  $^{13}\text{C}$  NMR ( $\text{CDCl}_3$ , 125 MHz)  $\delta$  25.1, 41.4, 114.4, 115.0, 117.1, 124.6, 126.7, 140.8. MS (ESI)  $m/z$ : 151 [ $\text{M}^+$ ].

*Journal* **2012**, *7*, 45-49.

- [2] Commercial chemical, CAS number: 145475-93-0
- [3] Commercial chemical, CAS number: 1304384-94-8
- [4] Commercial chemical, CAS number: 1154327-13-5
- [5] H. J. Reich, S. Wollowitz, *Journal of the American Chemical Society* **1982**, *104*, 7051-7059.
- [6] P. K. Dornan, K. G. M. Kou, K. N. Houk, V. M. Dong, *Journal of the American Chemical Society* **2014**, *136*, 291-298.
- [7] C. C. Malakar, E. Merisor, J. r. Conrad, U. Beifuss, *Synlett* **2010**, 1766-1770.
- [8] B. Pirotte, P. de Tullio, Q.-A. Nguyen, F. Somers, P. Fraikin, X. Florence, P. Wahl, J. B. Hansen, P. Lebrun, *Journal of Medicinal Chemistry* **2010**, *53*, 147-154.
- [9] Commercial chemical, CAS number: 22057-43-8
- [10] M. Wang, M. Gao, K. D. Miller, G. W. Sledge, Q.-H. Zheng, *Bioorganic & Medicinal Chemistry Letters* **2012**, *22*, 1569-1574.
- [11] N. Iranpoor, H. Firouzabadi, A. Rostami, *Applied Organometallic Chemistry* **2013**, *27*, 501-506.
- [12] Hernandez, Vincent S.; Li, Xianfeng; Zhang, Suoming; Akama, PCT Int. Appl. (2011), WO 2011060196.
- [13] M. Kalita, T. Bhattacharjee, P. Gogoi, P. Barman, R. D. Kalita, B. Sarma, S. Karmakar, *Polyhedron* **2013**, *60*, 47-53.
- [14] Y. Gao, Q. Song, G. Cheng, X. Cui, *Organic & Biomolecular Chemistry* **2014**, *12*, 1044-1047.
- [15] M. Wang, M. Gao, B. H. Mock, K. D. Miller, G. W. Sledge, G. D. Hutchins, Q.-H. Zheng, *Bioorganic & Medicinal Chemistry* **2006**, *14*, 8599-8607.
- [16] A. Monopoli, P. Cotugno, M. Cortese, C. D. Calvano, F. Ciminale, A. Nacci, *European Journal of Organic Chemistry* **2012**, 3105-3111.

### 3 NMR Spectra of All Products

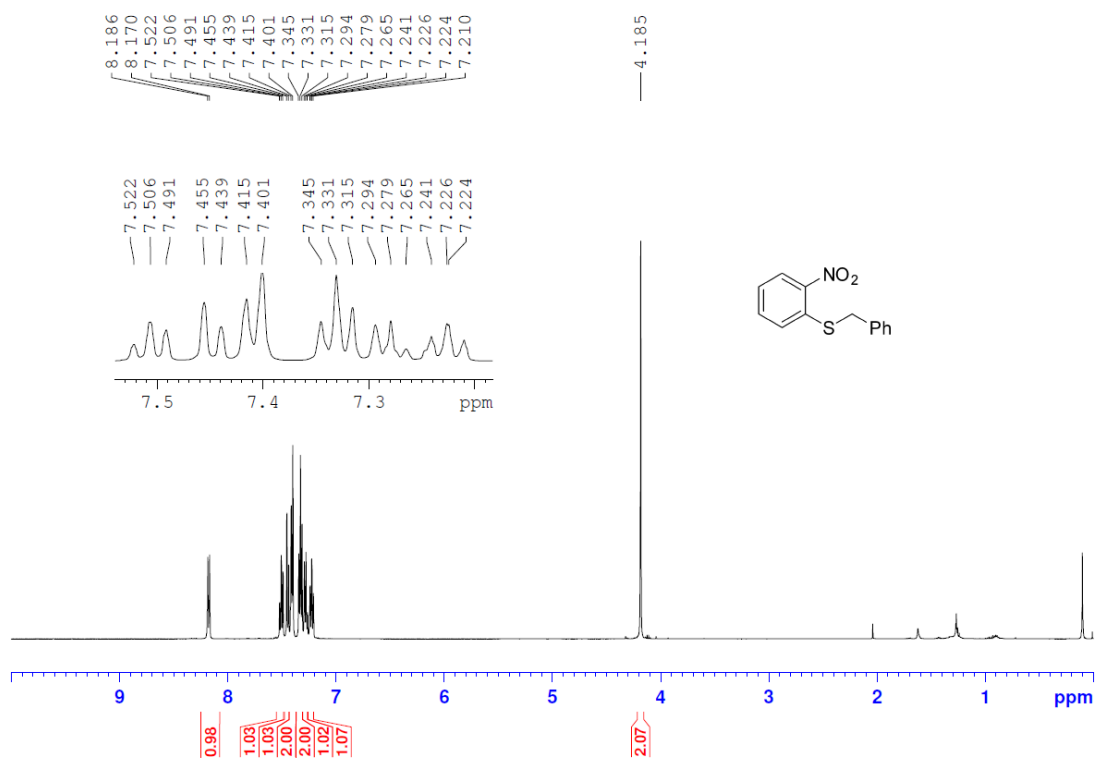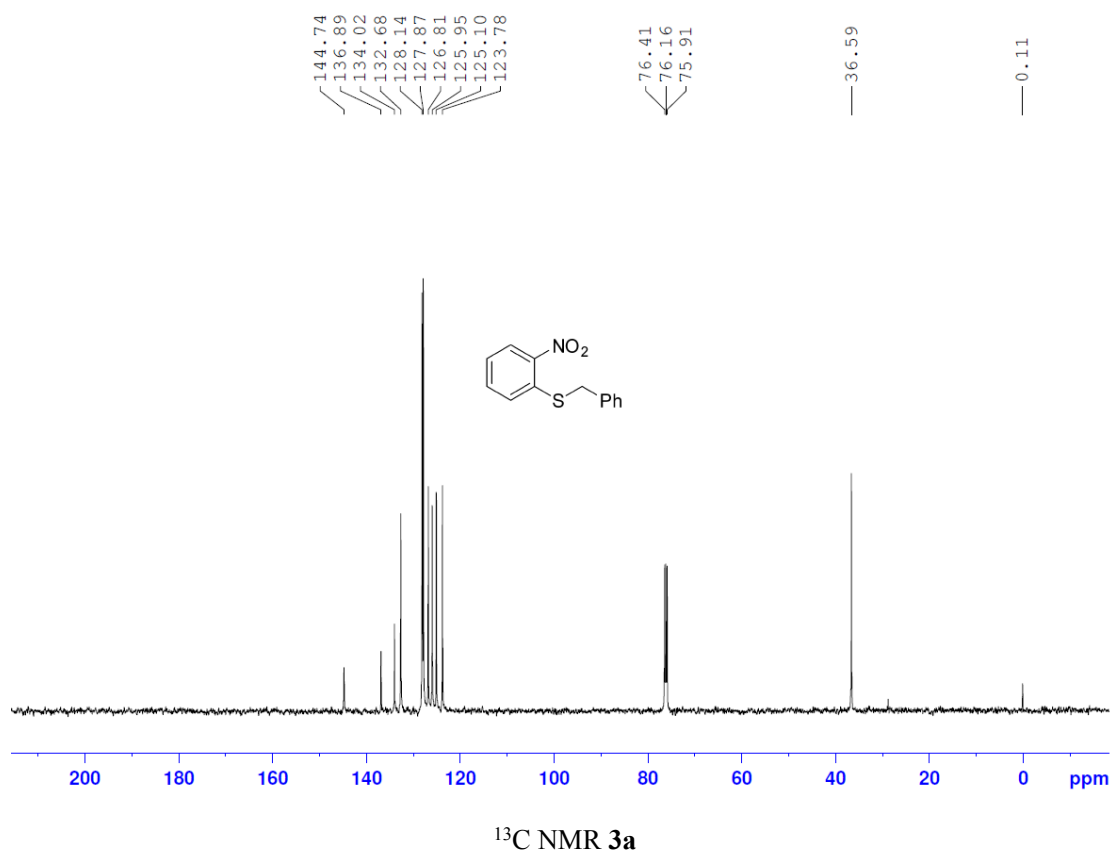

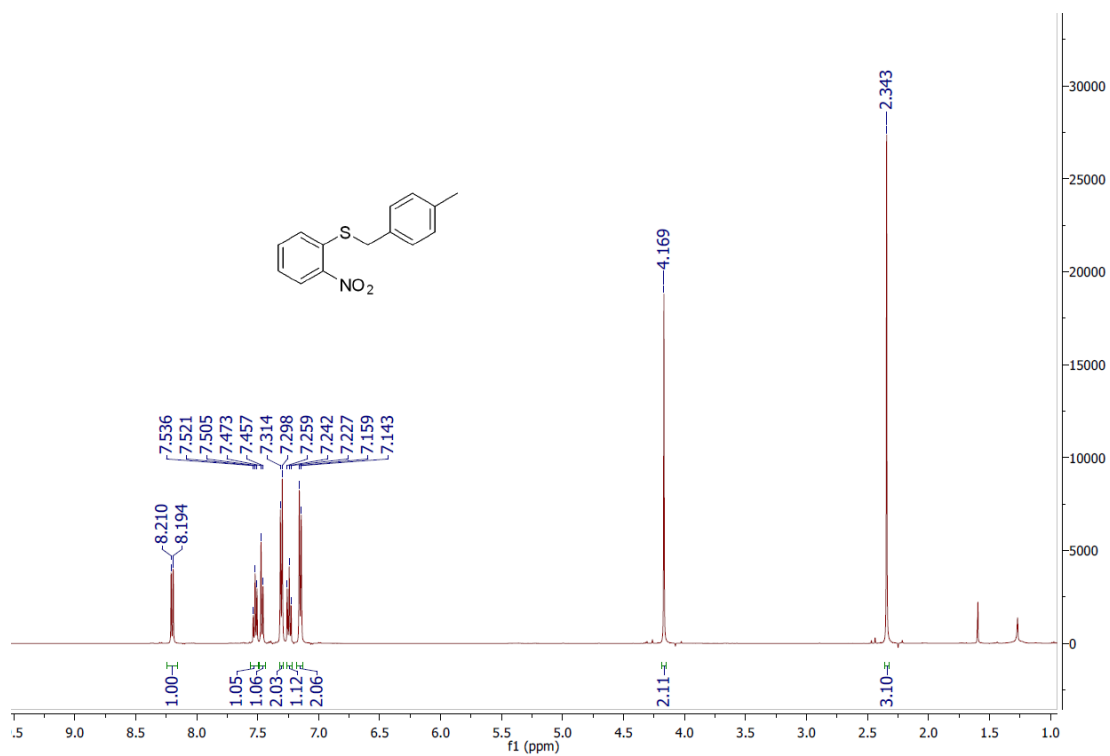<sup>1</sup>H NMR 3b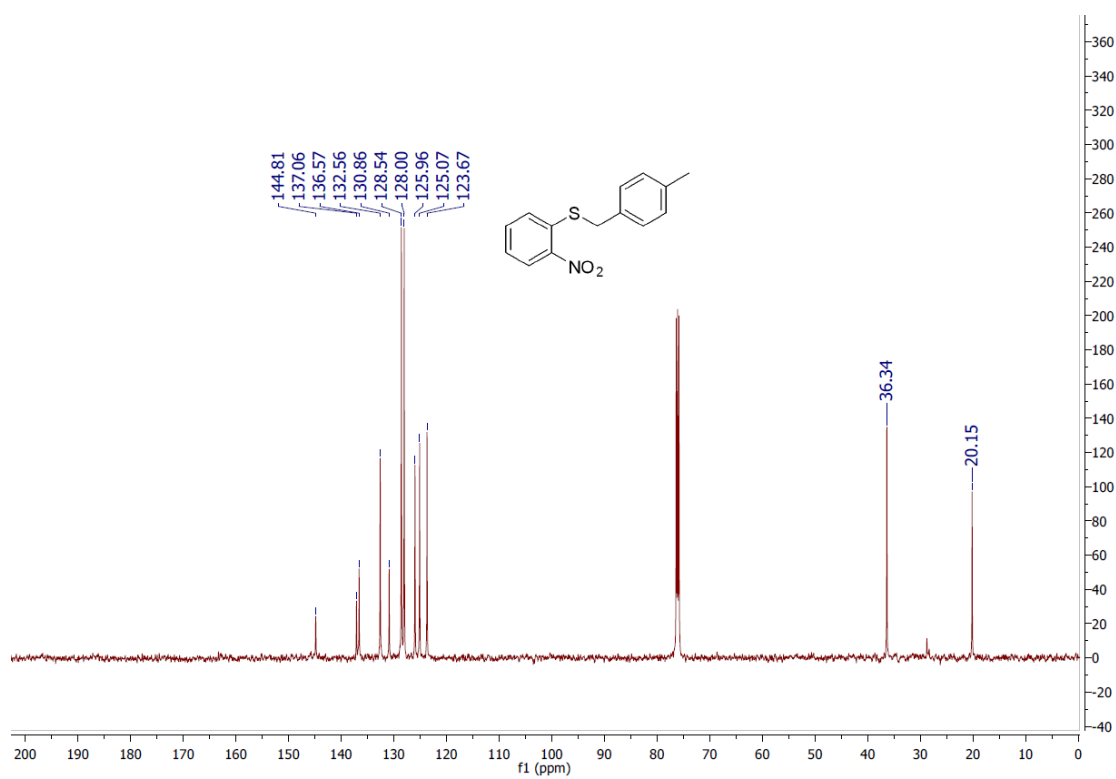<sup>13</sup>C NMR 3b

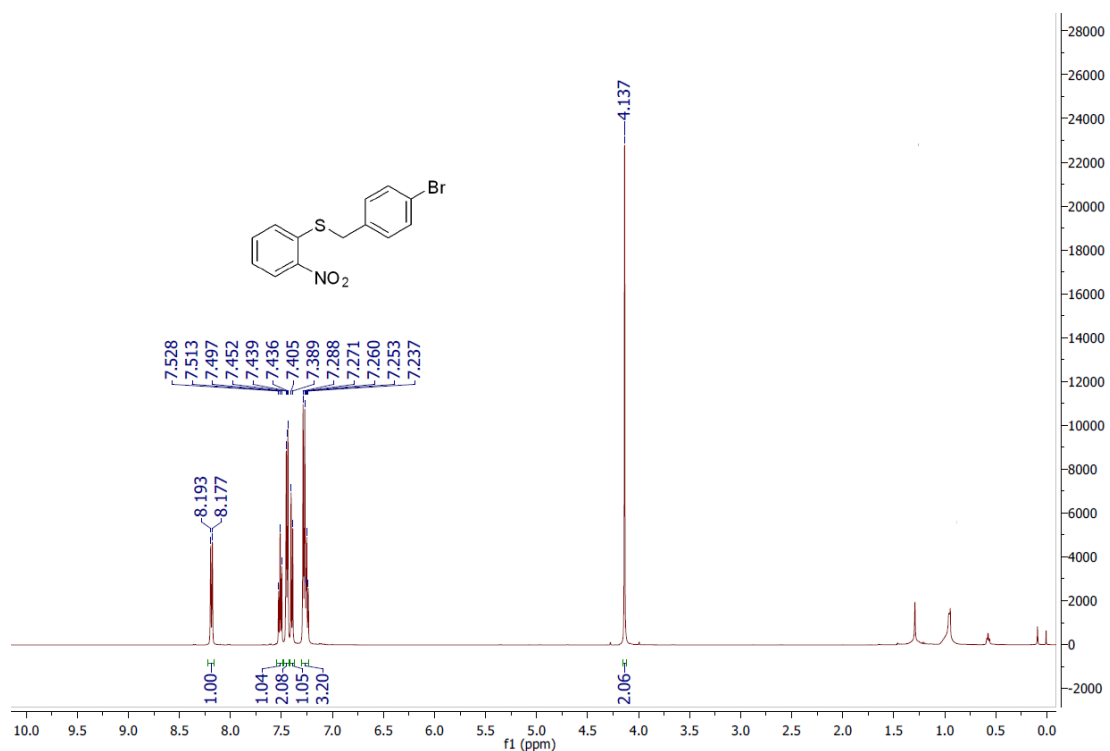<sup>1</sup>H NMR 3c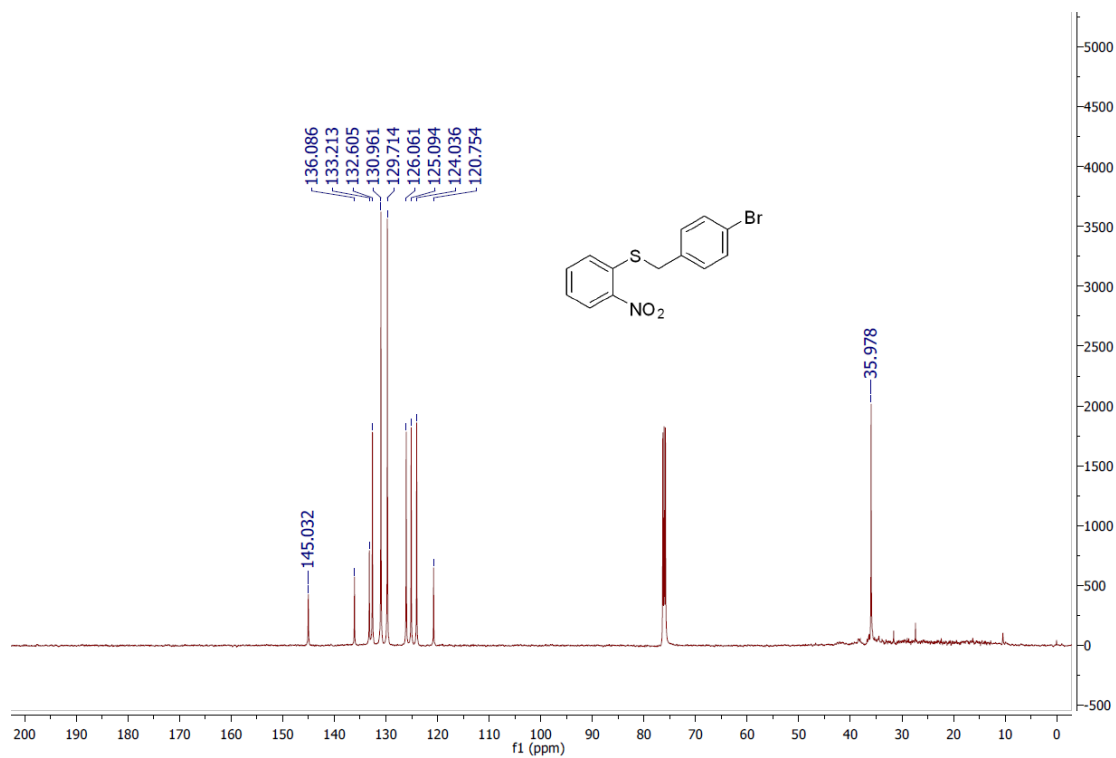<sup>13</sup>C NMR 3c

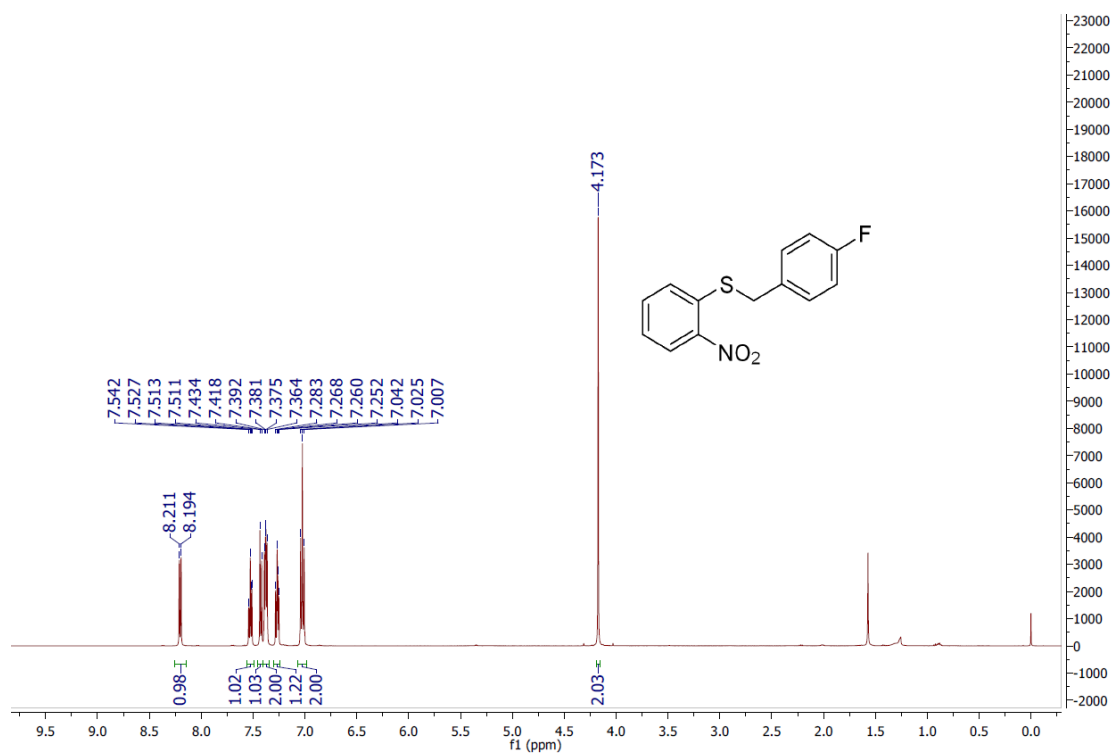<sup>1</sup>H NMR 3d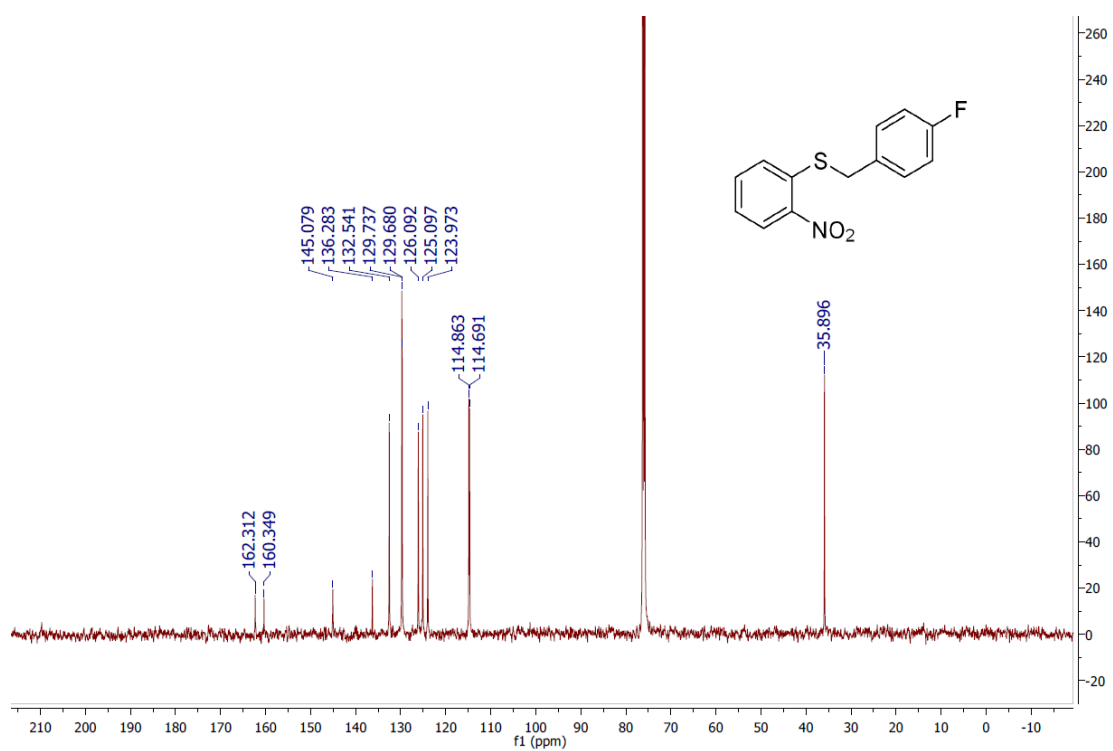<sup>13</sup>C NMR 3d

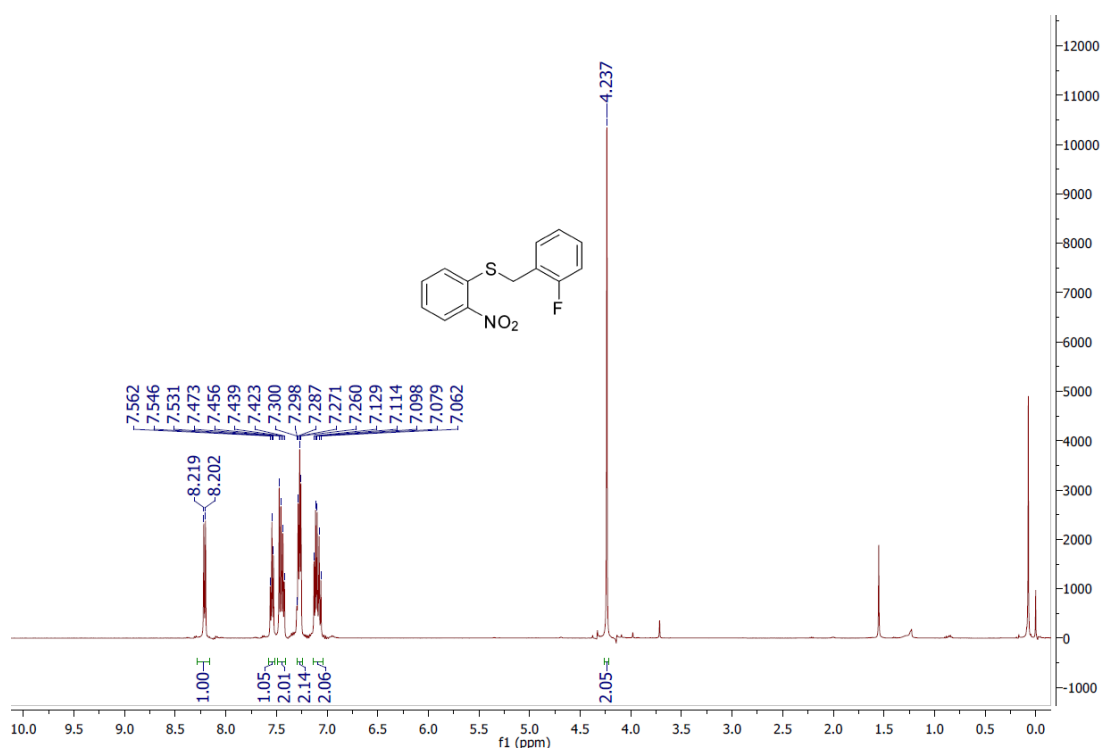<sup>1</sup>H NMR 3e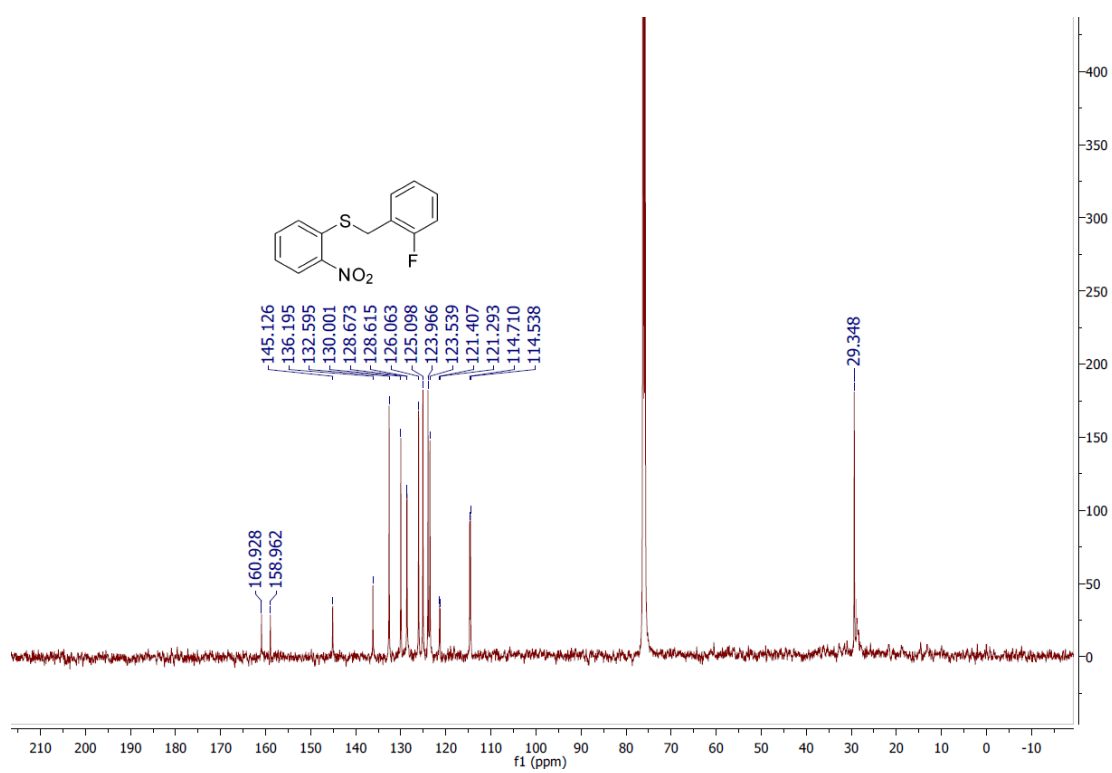<sup>13</sup>C NMR 3e

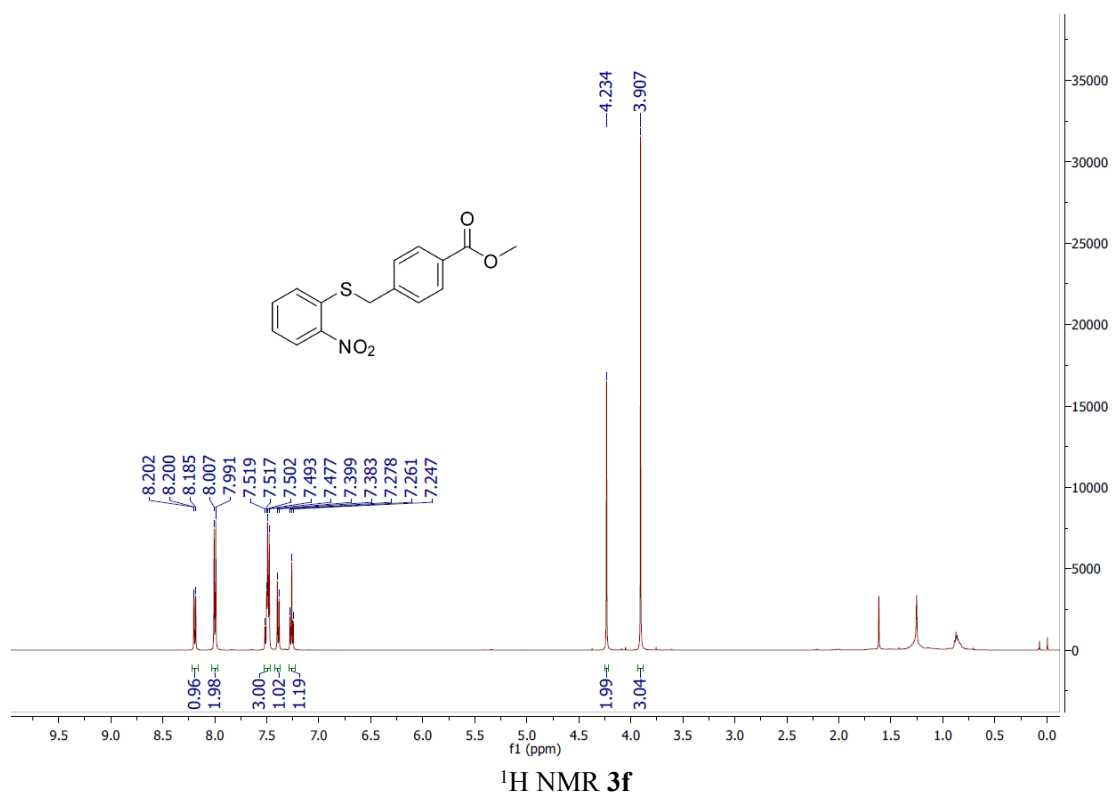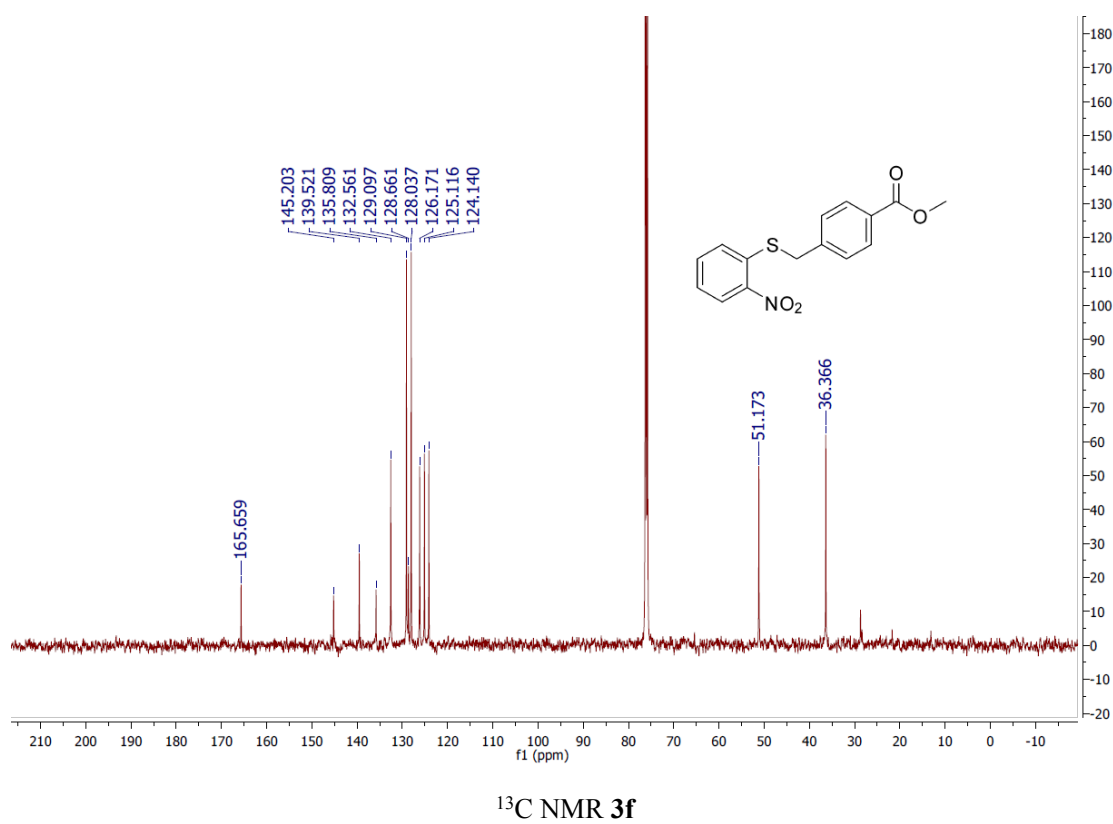



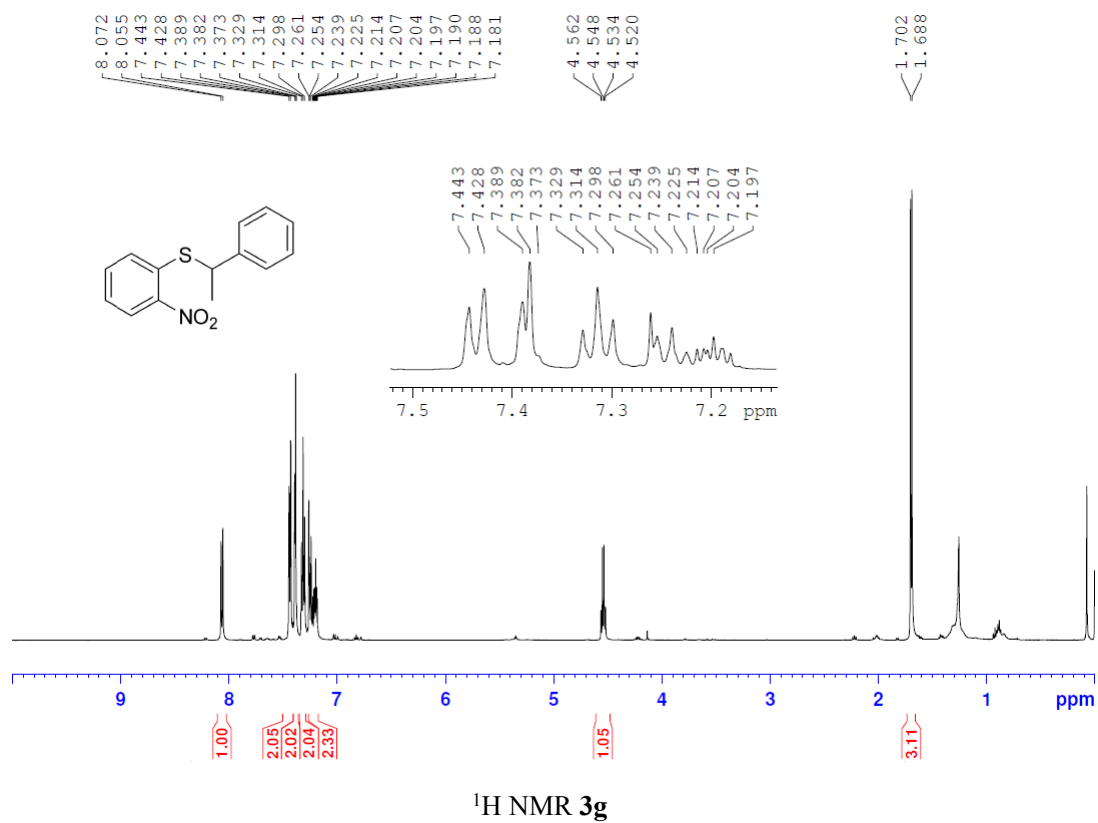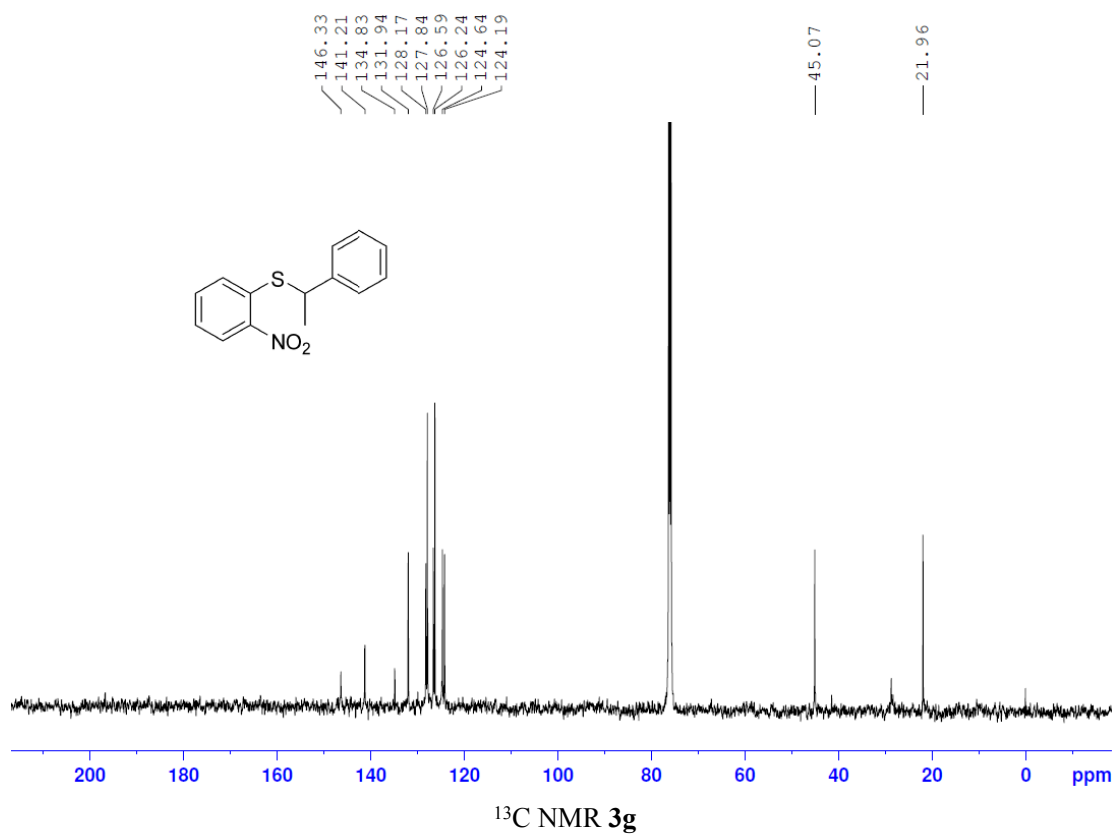

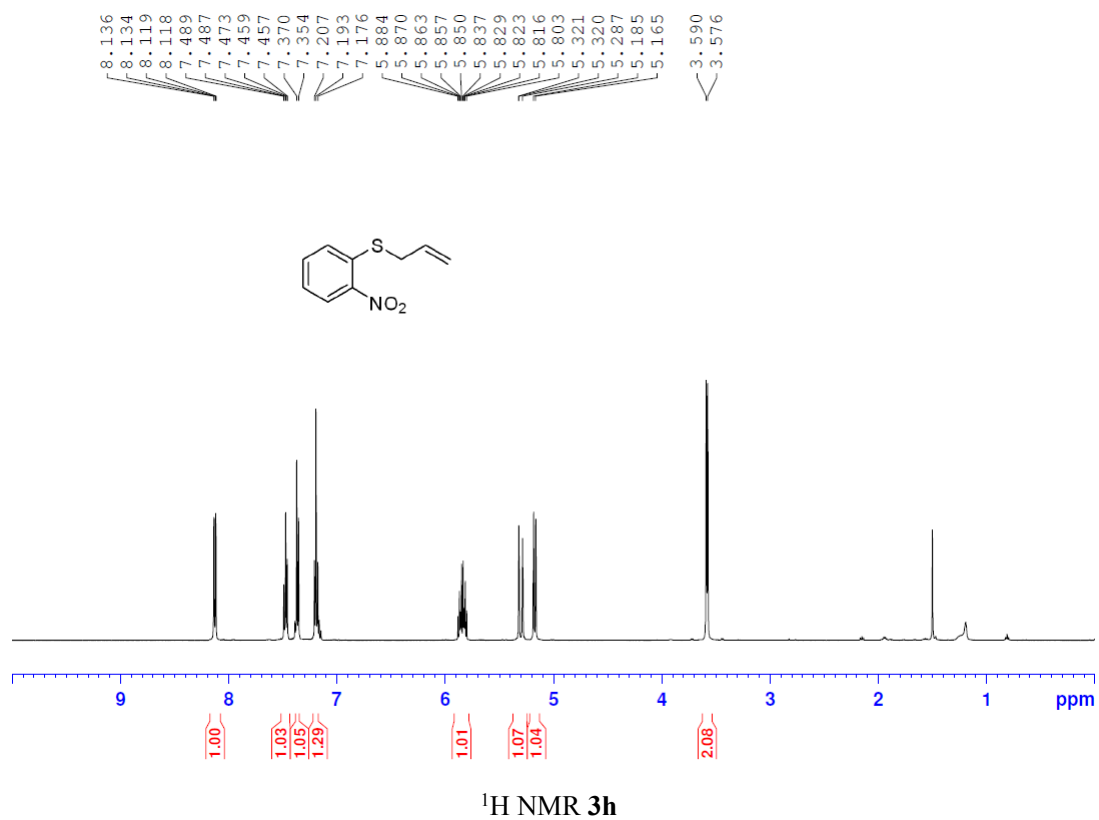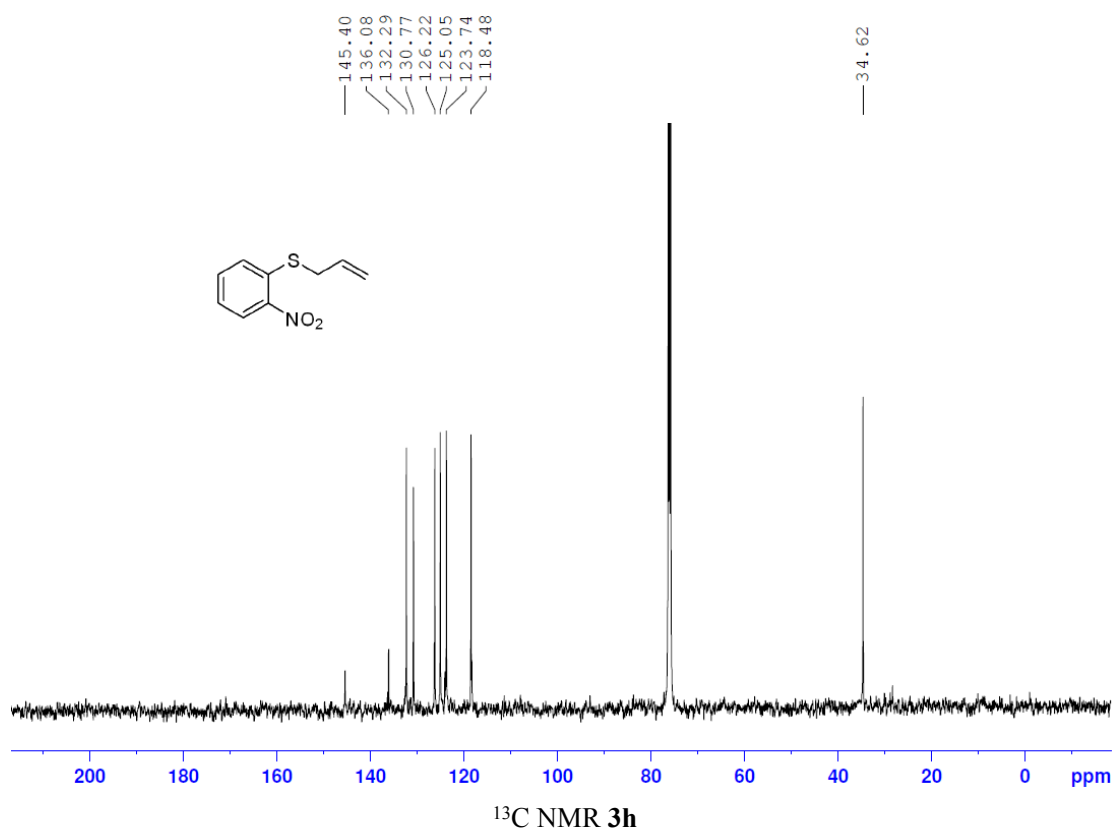

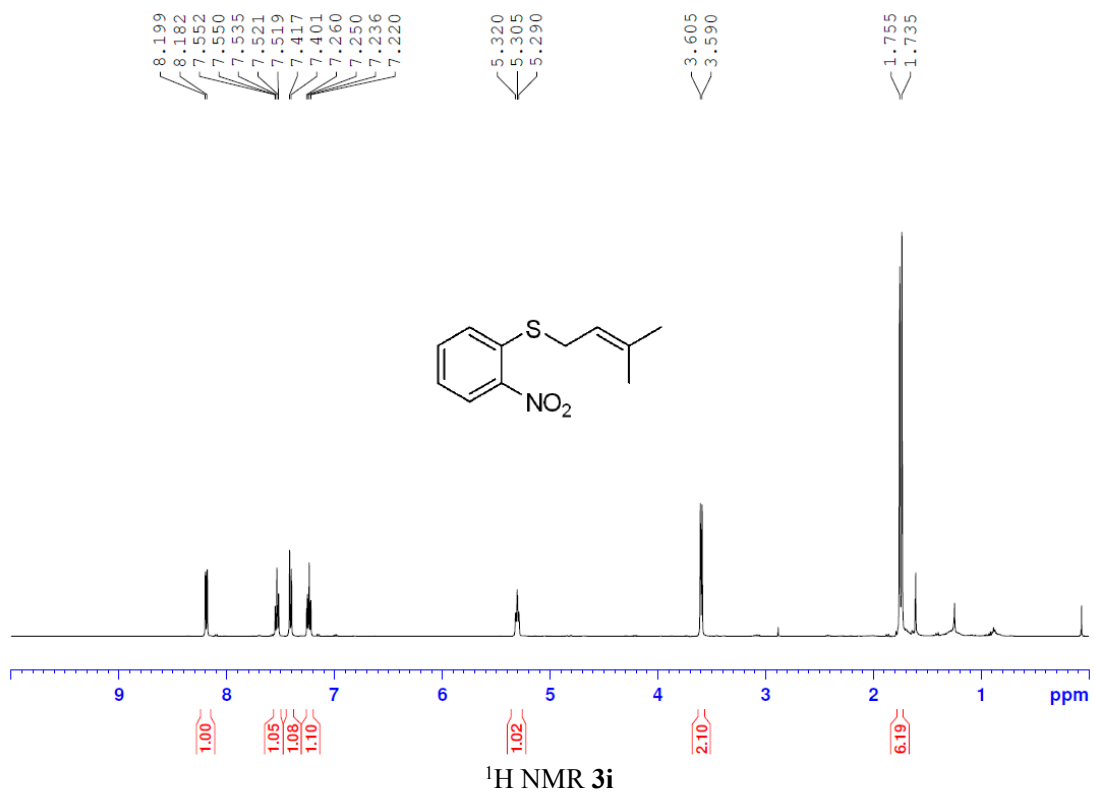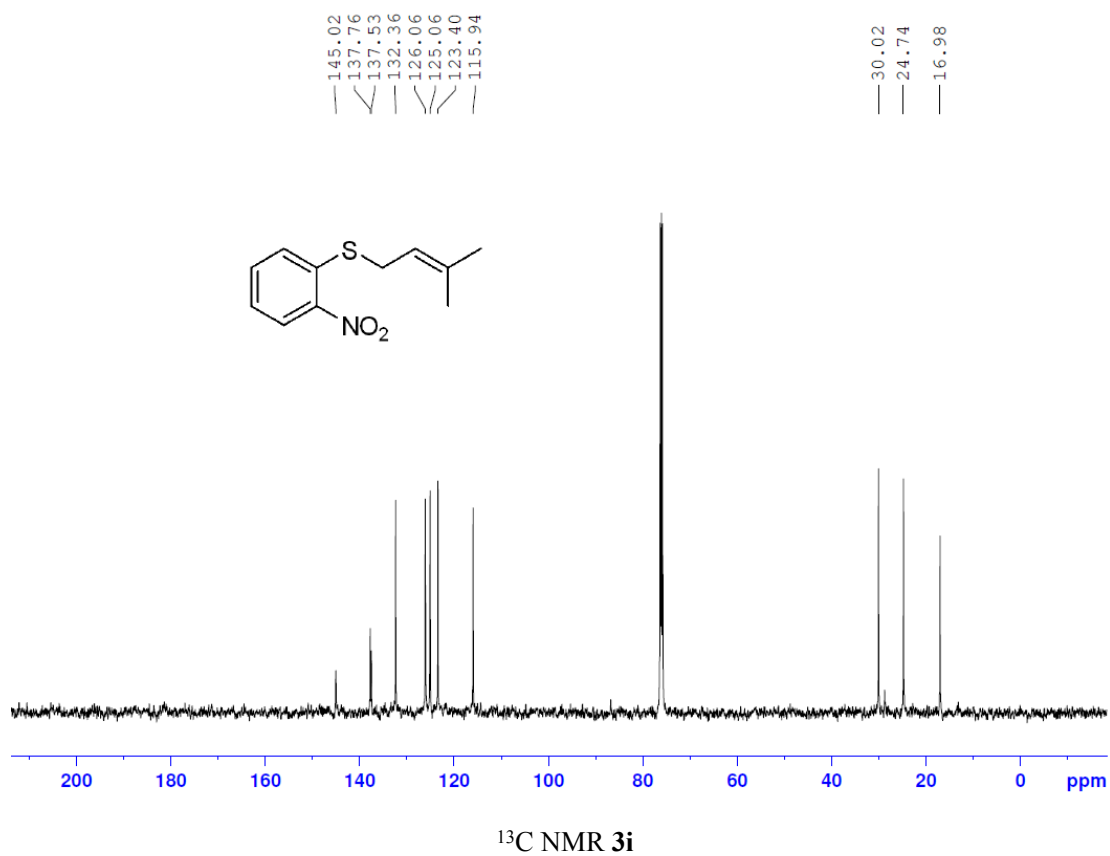

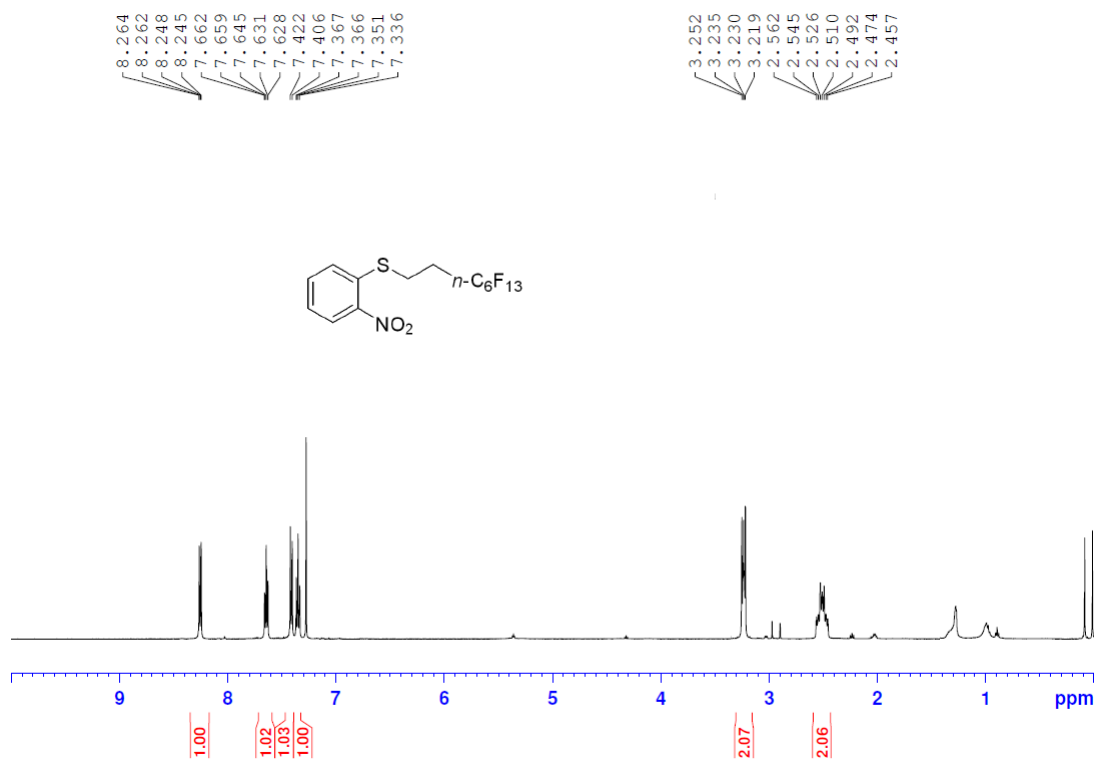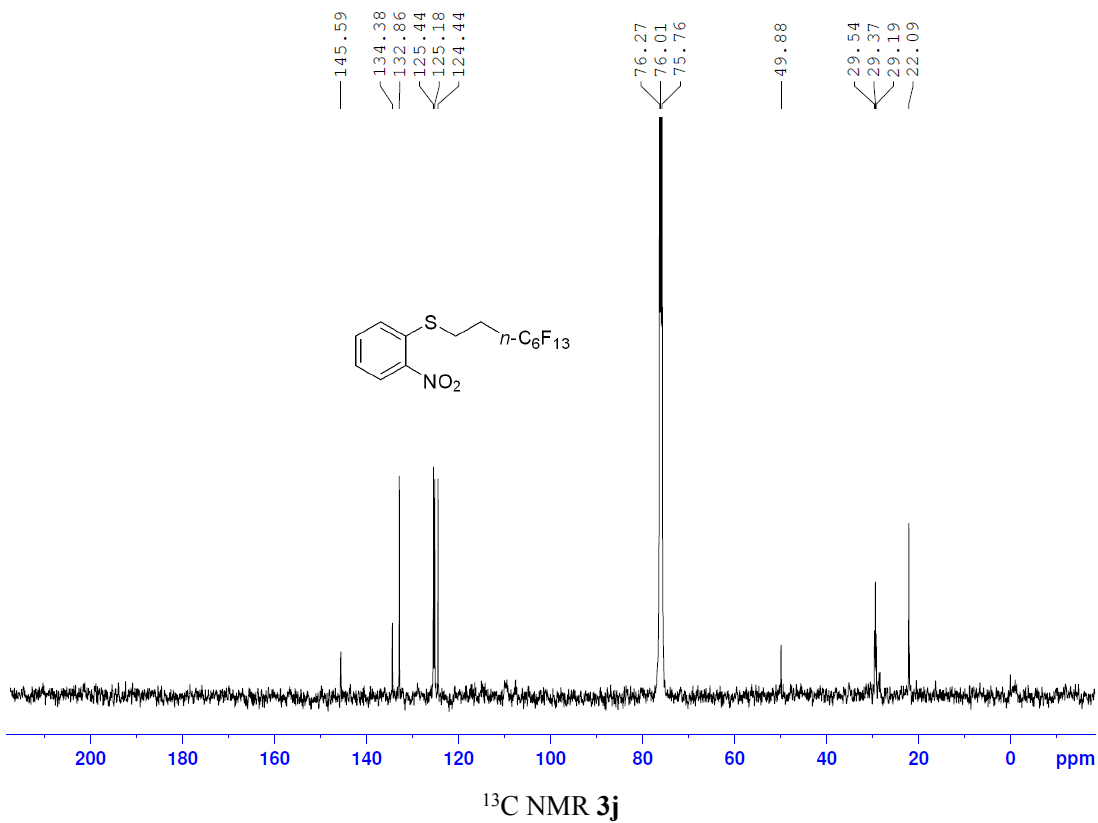

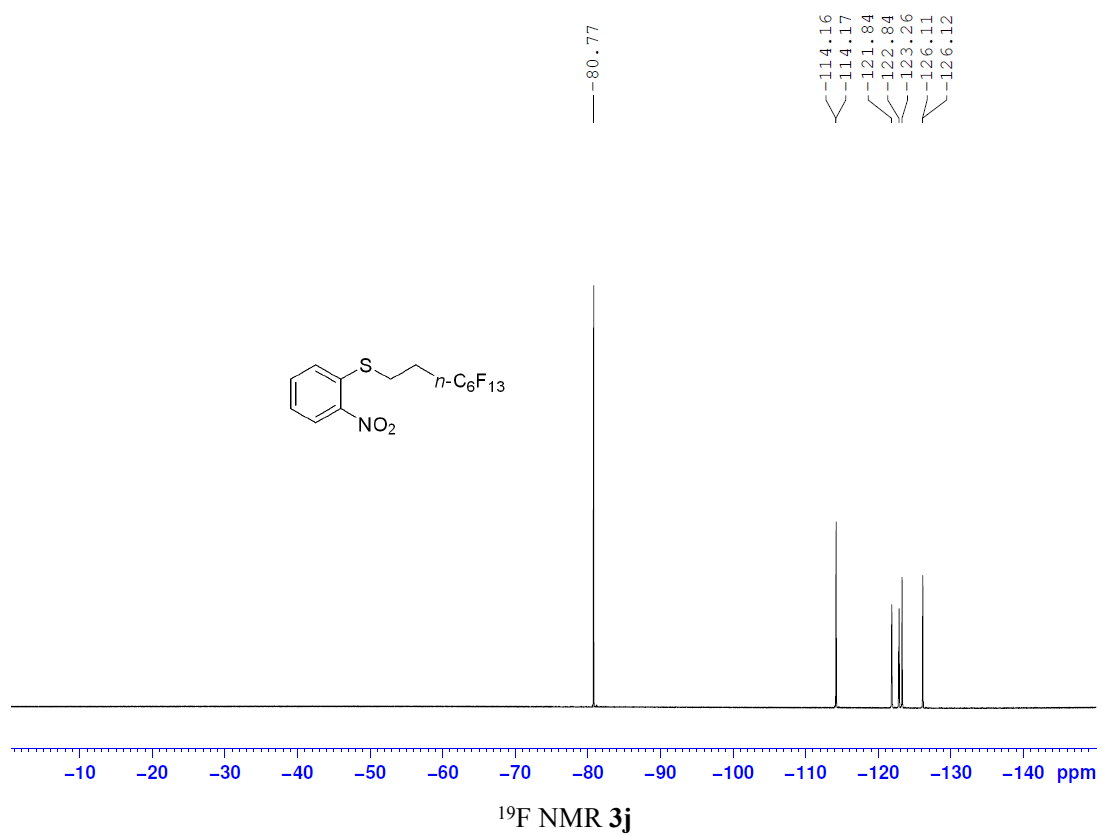

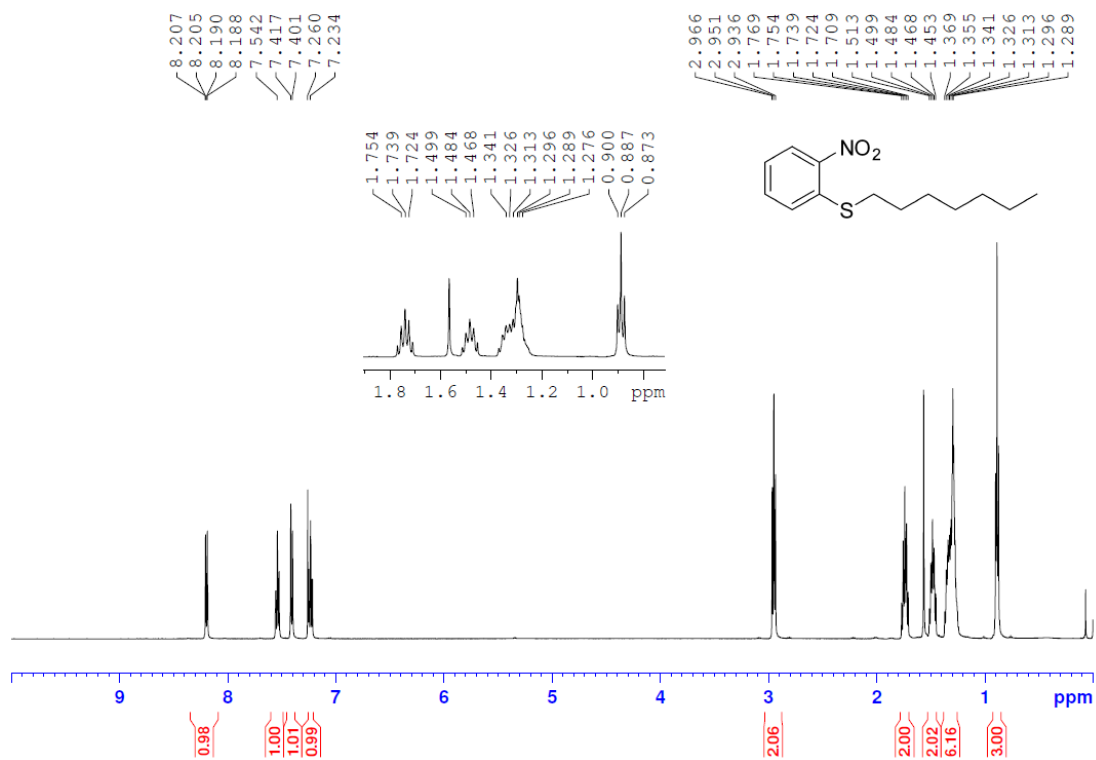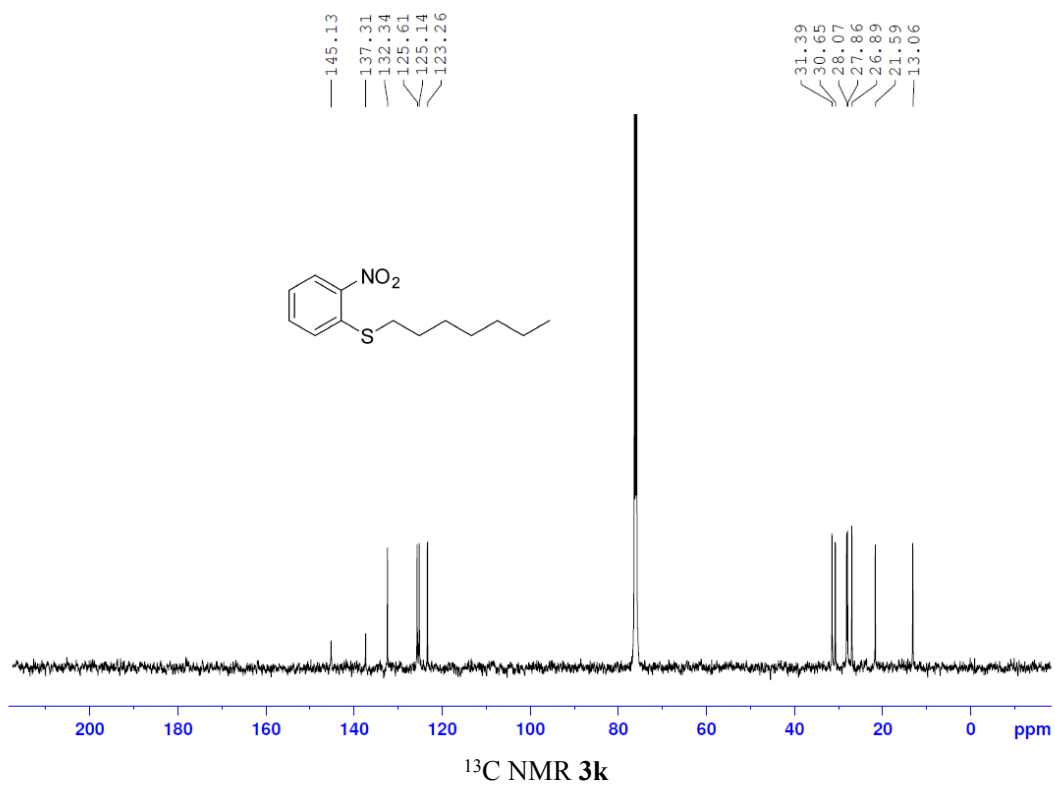

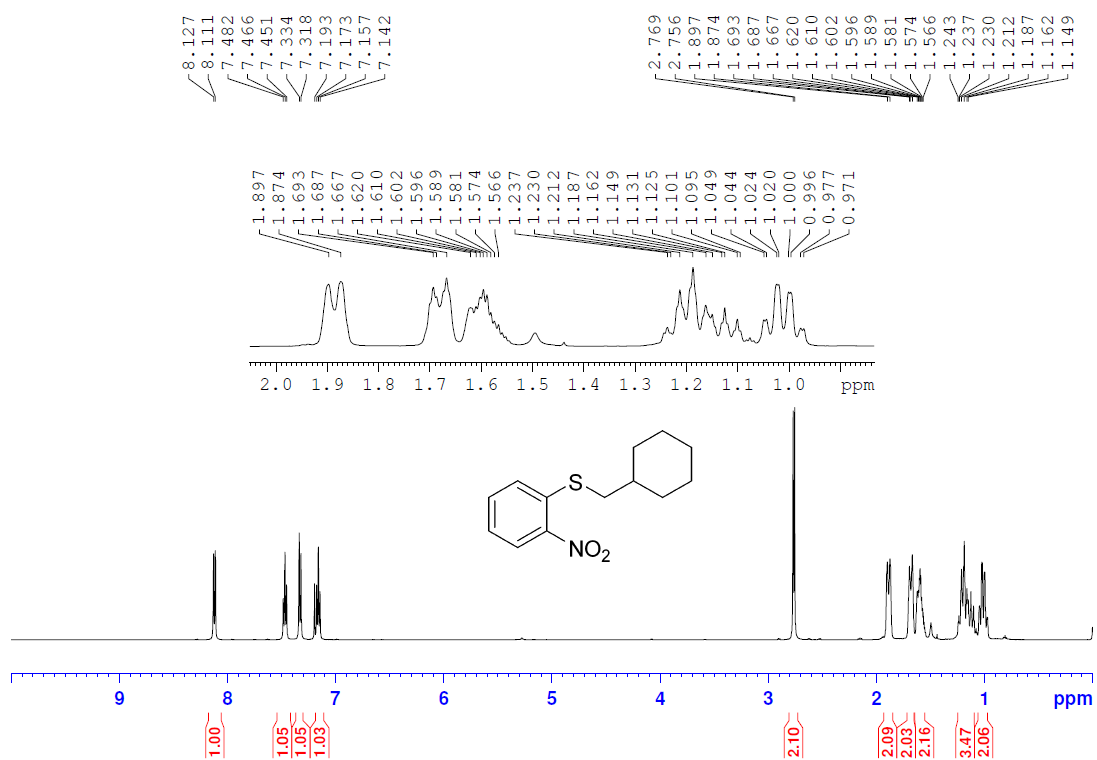**<sup>1</sup>H NMR 31**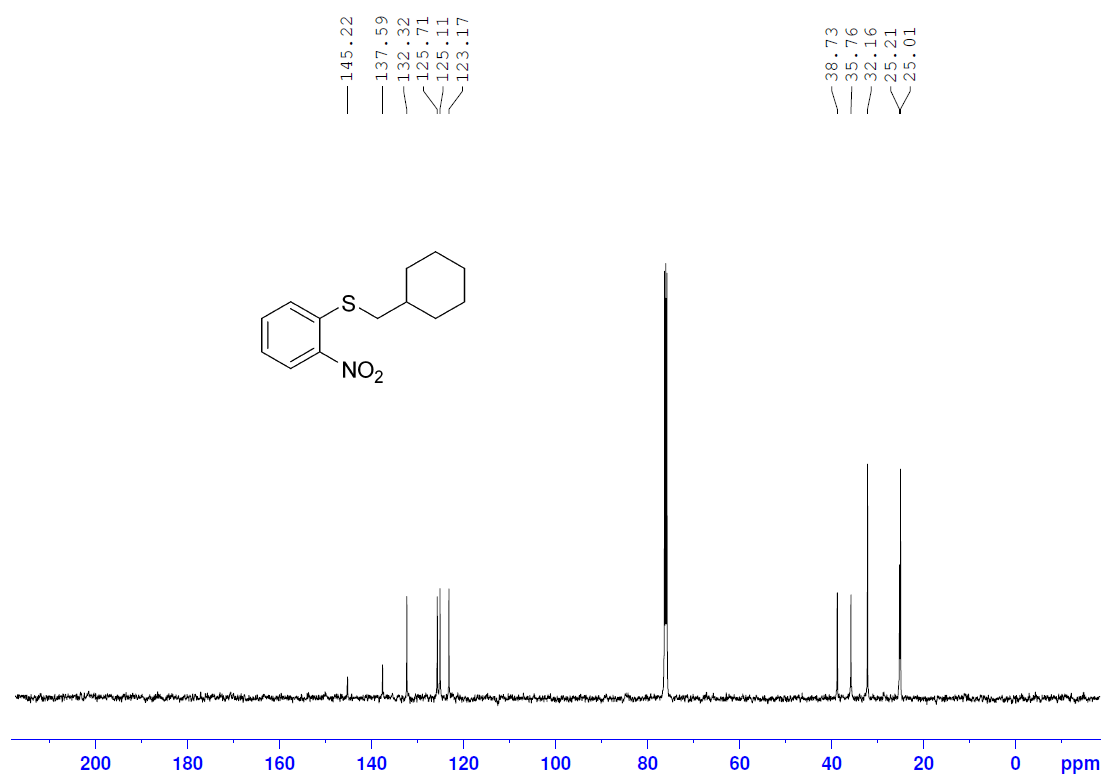**<sup>13</sup>C NMR 31**

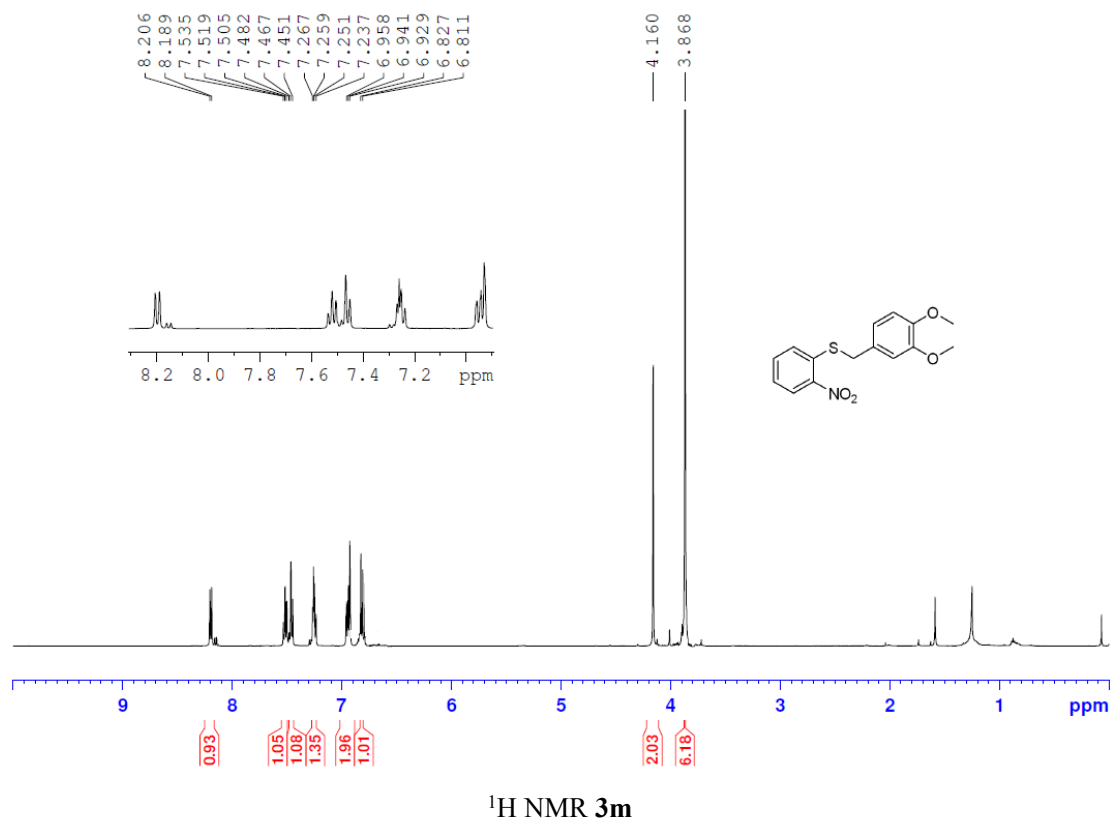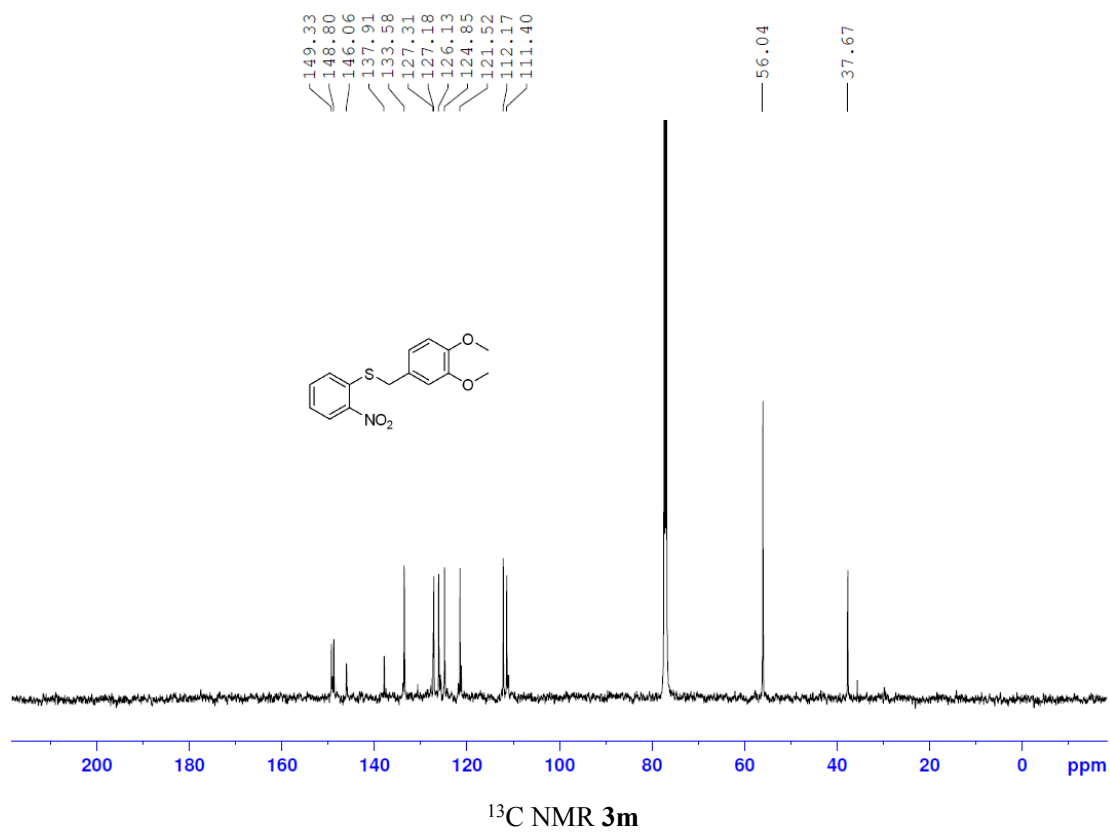



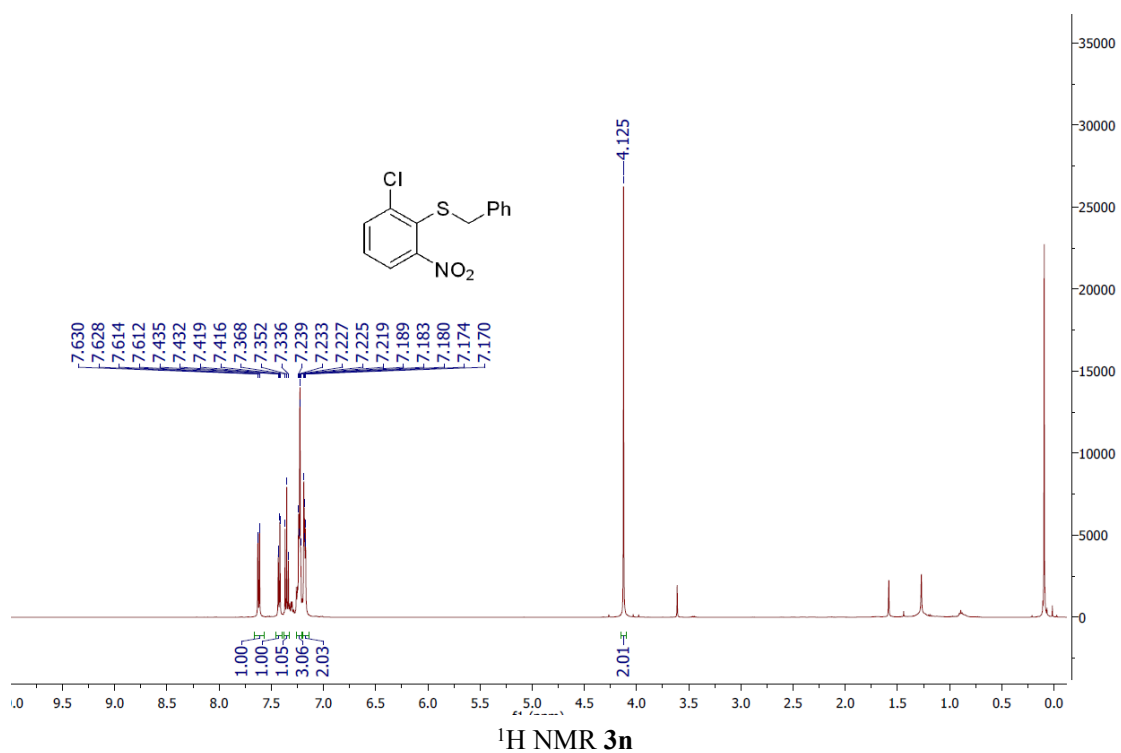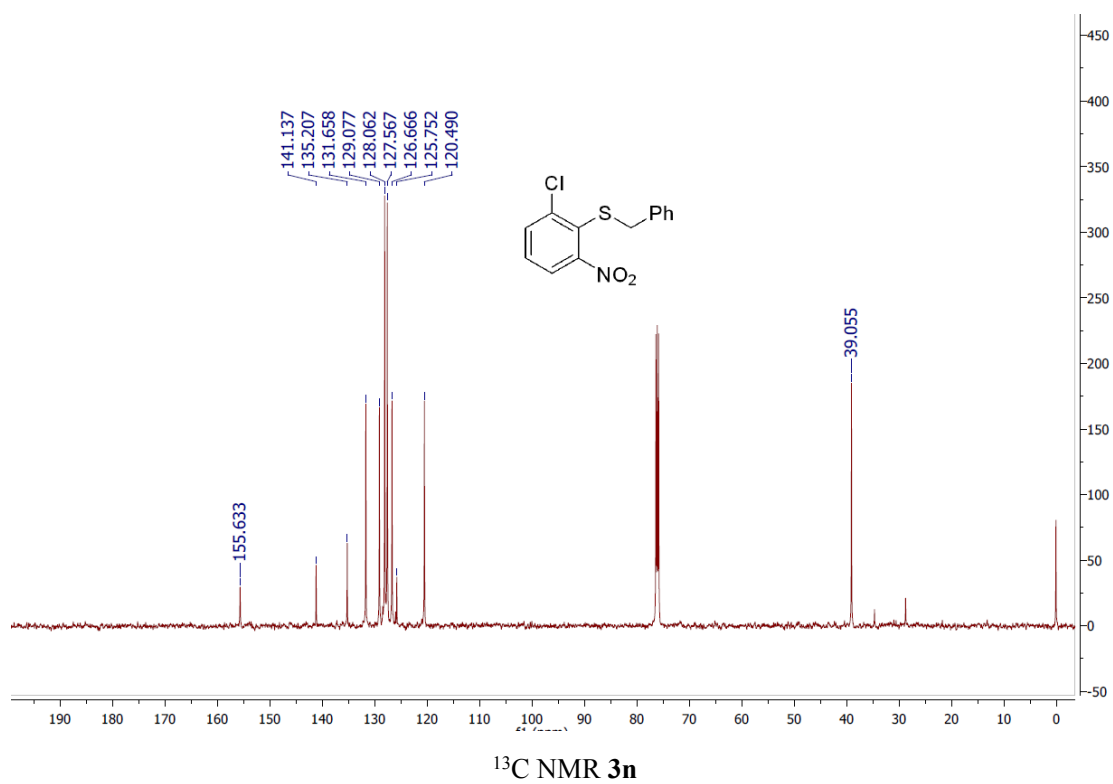

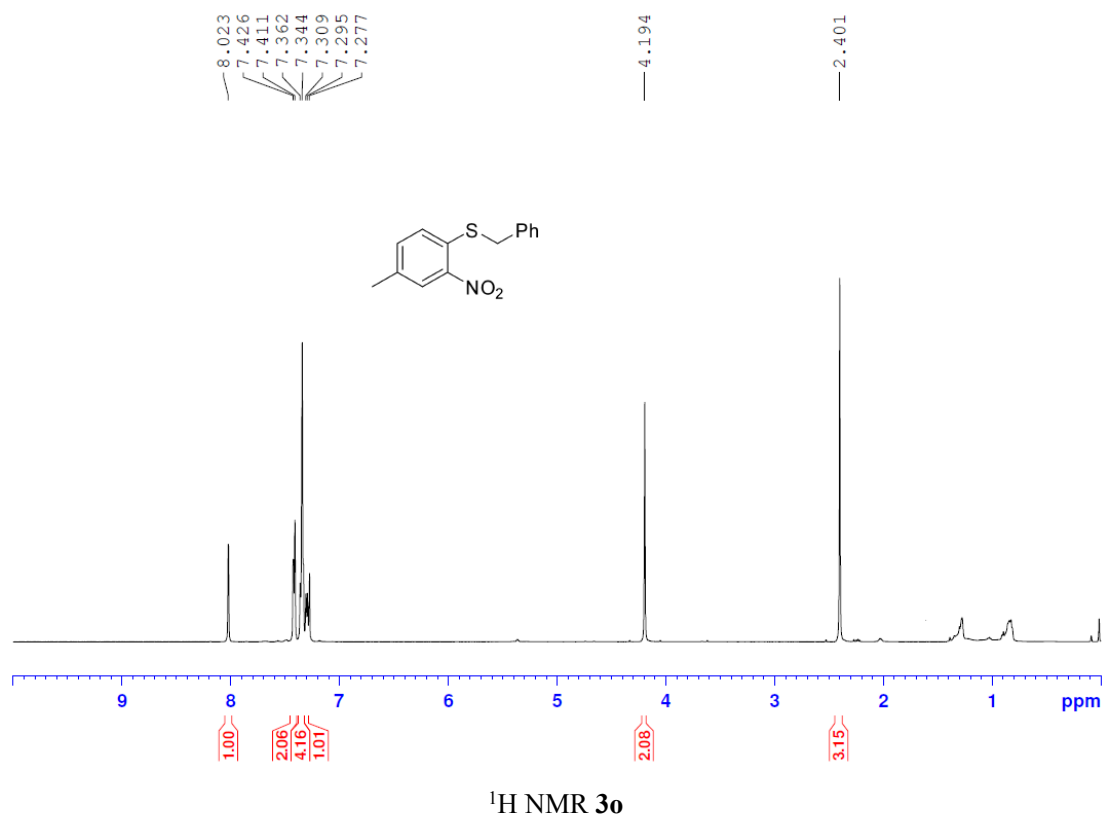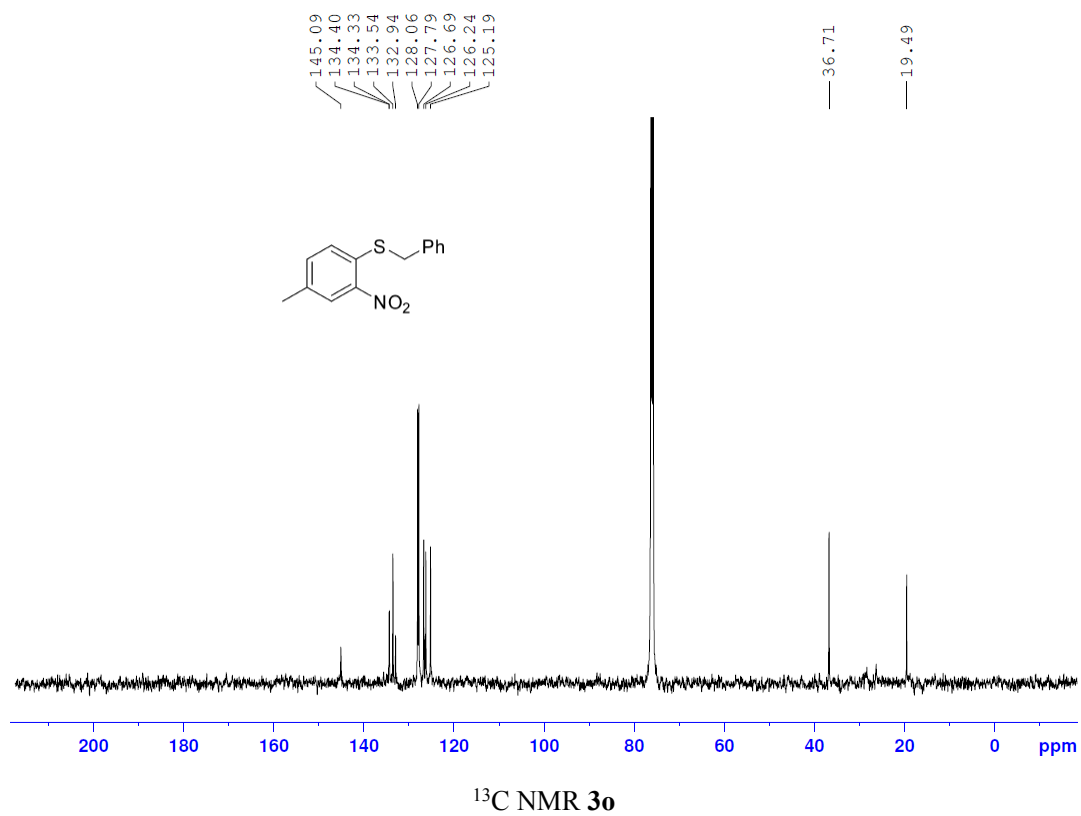

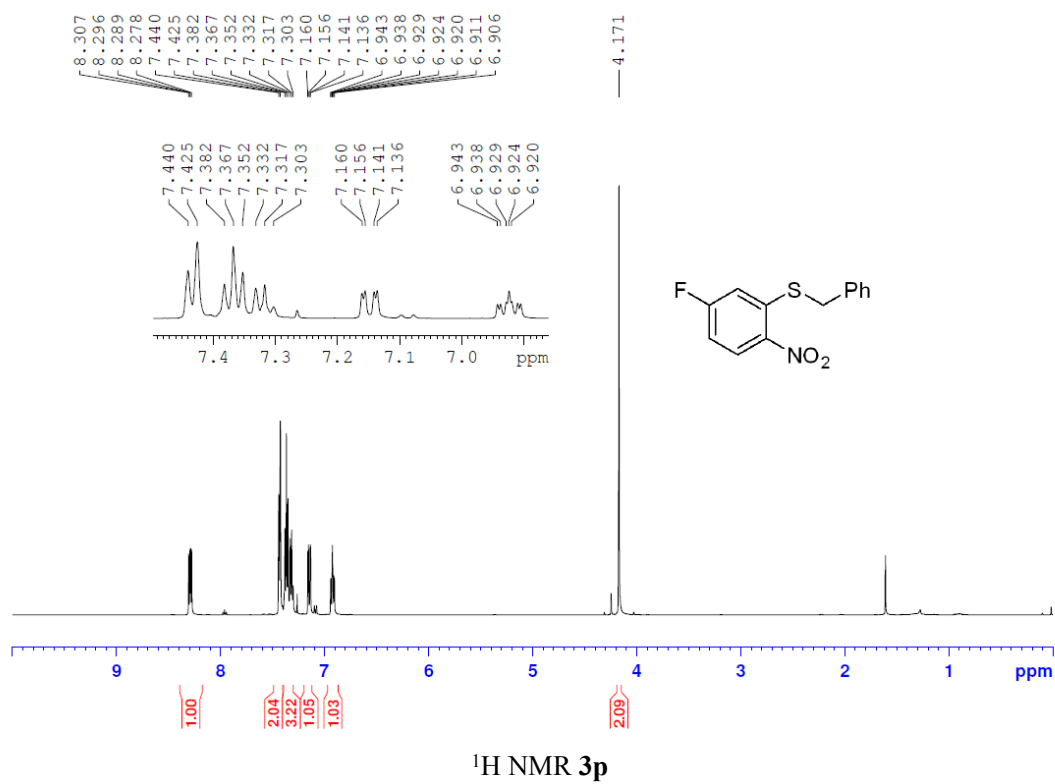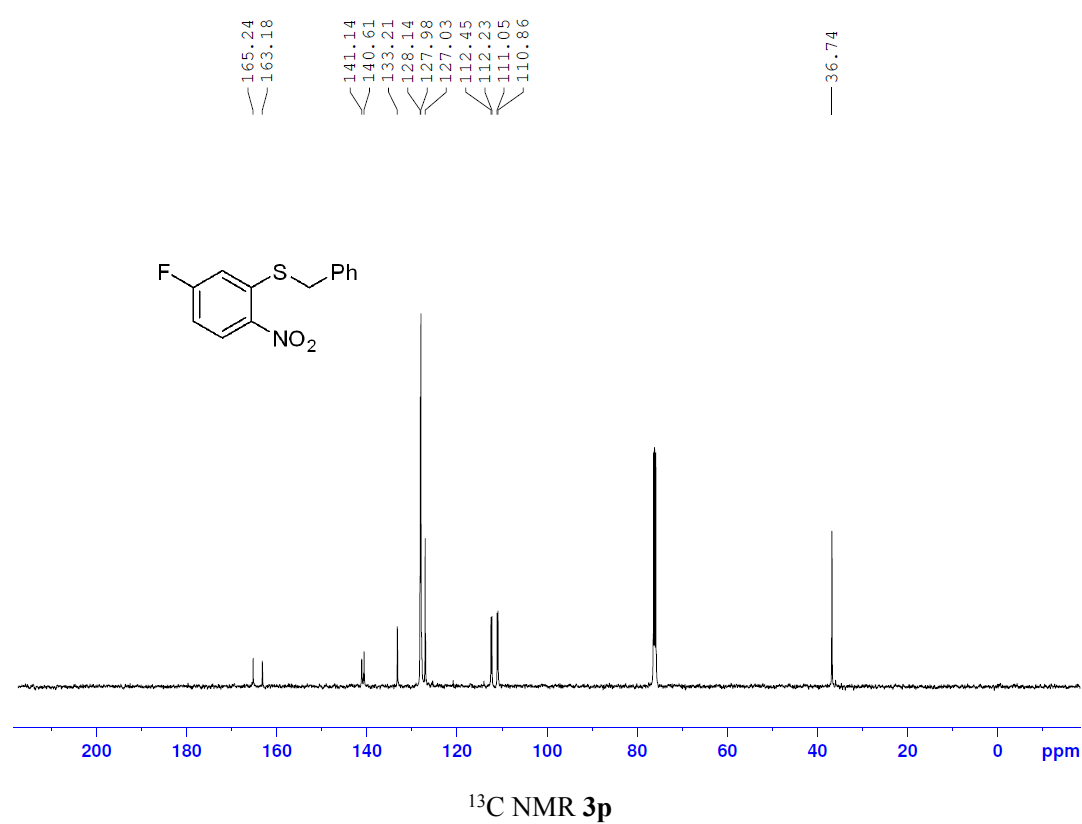

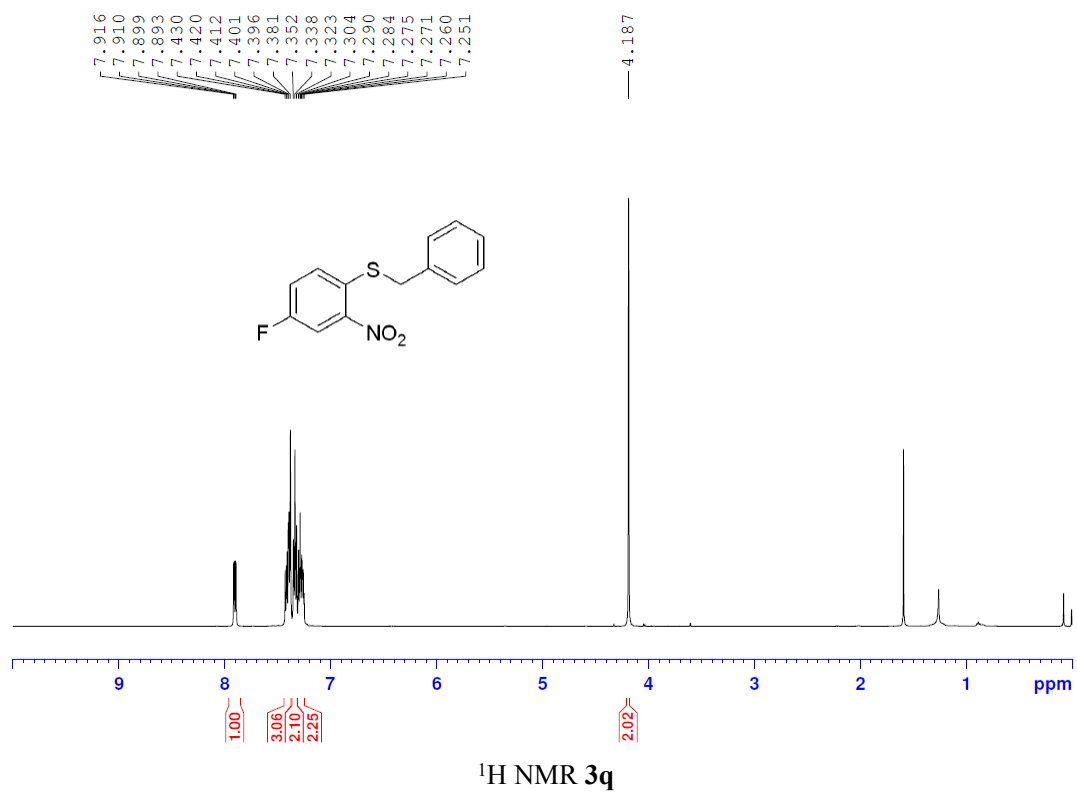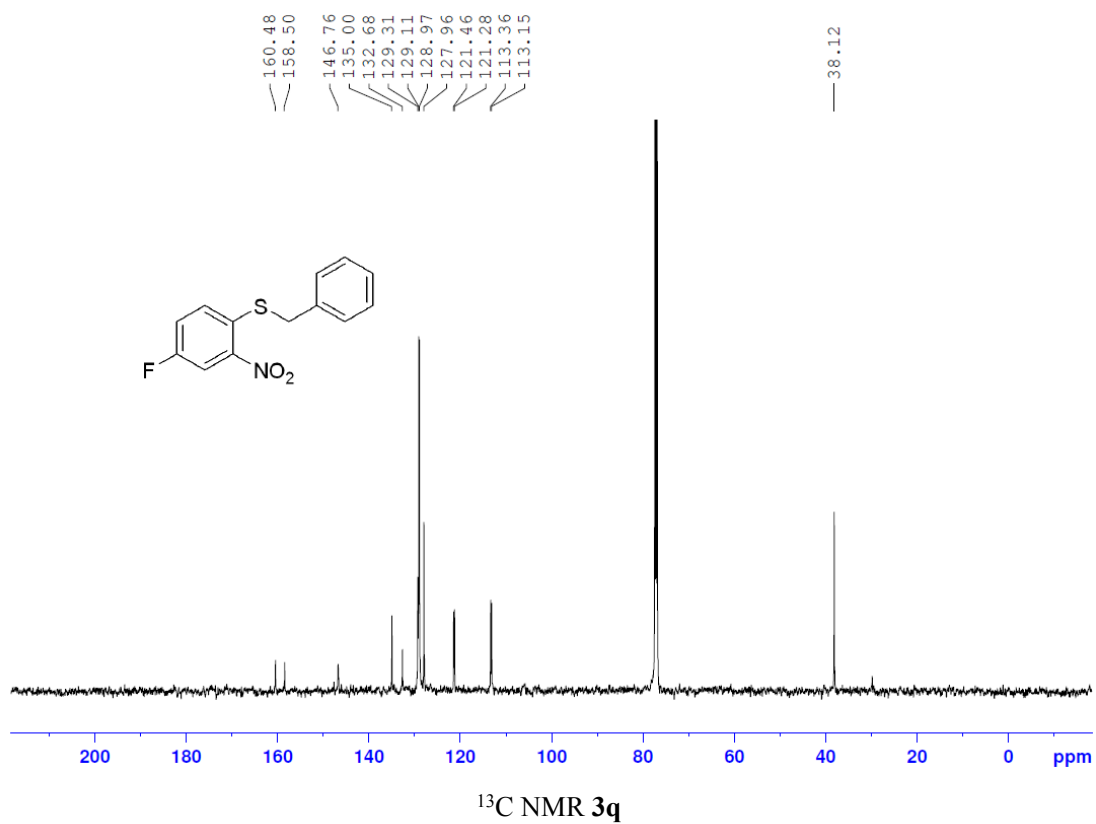

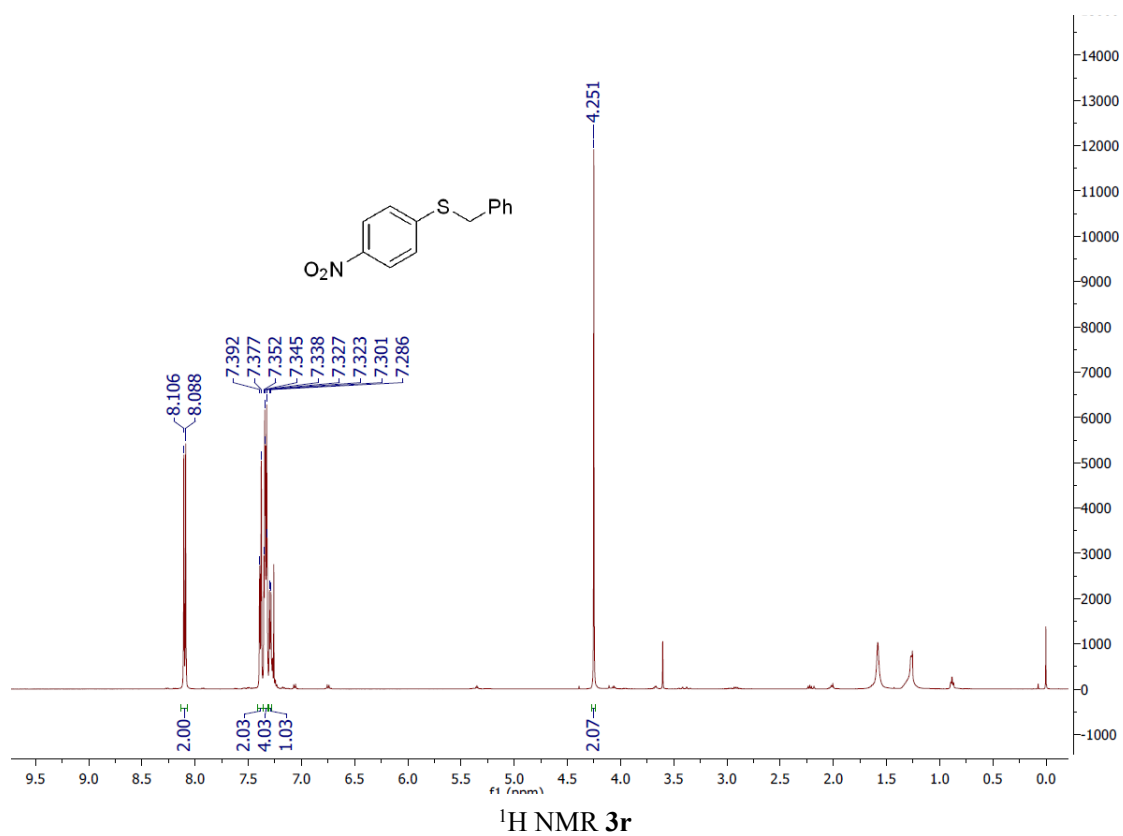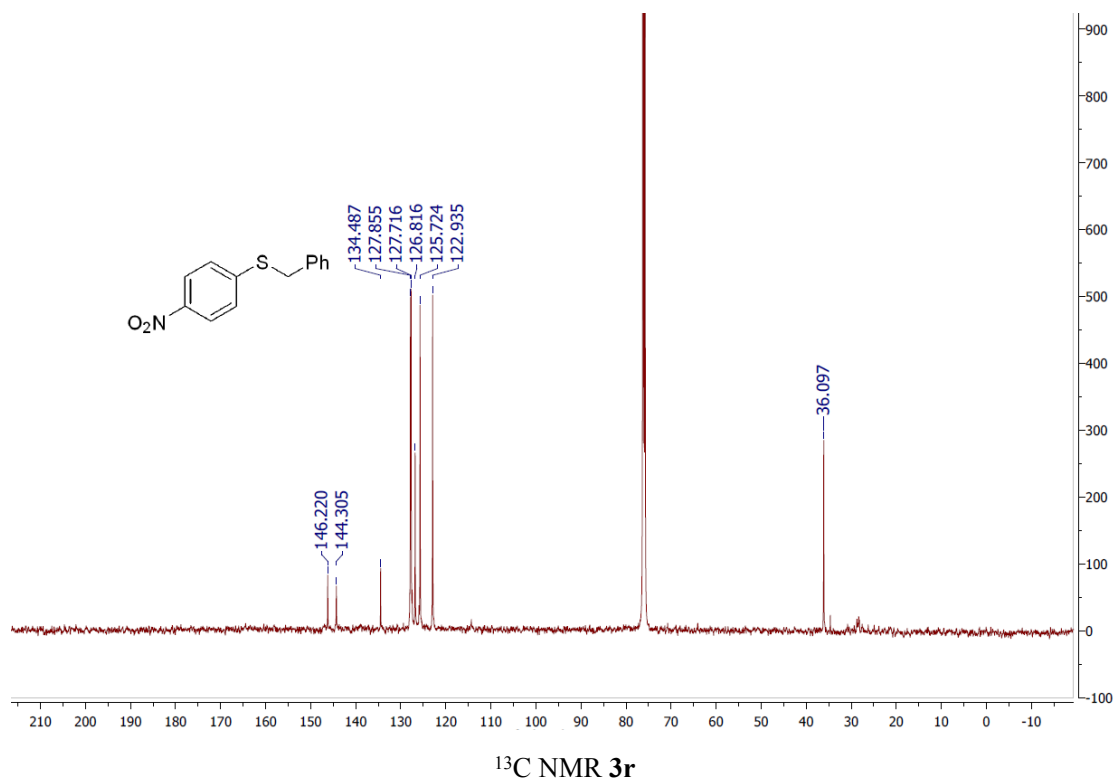

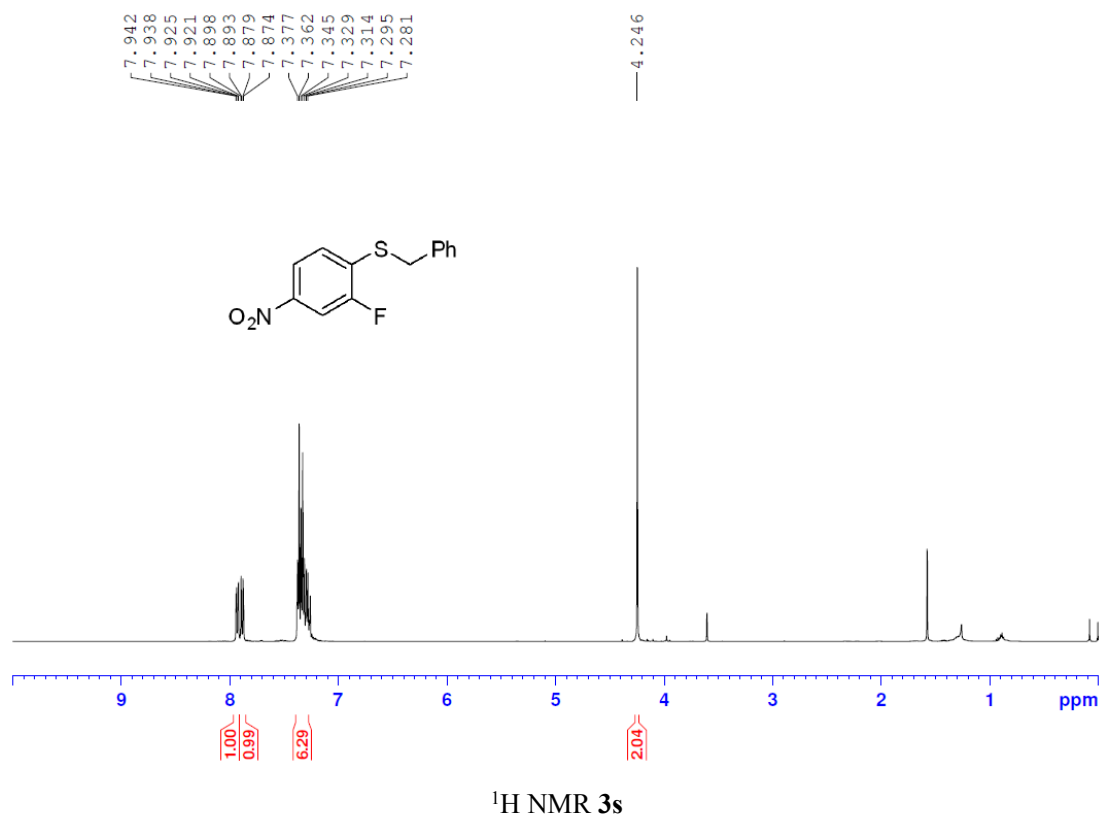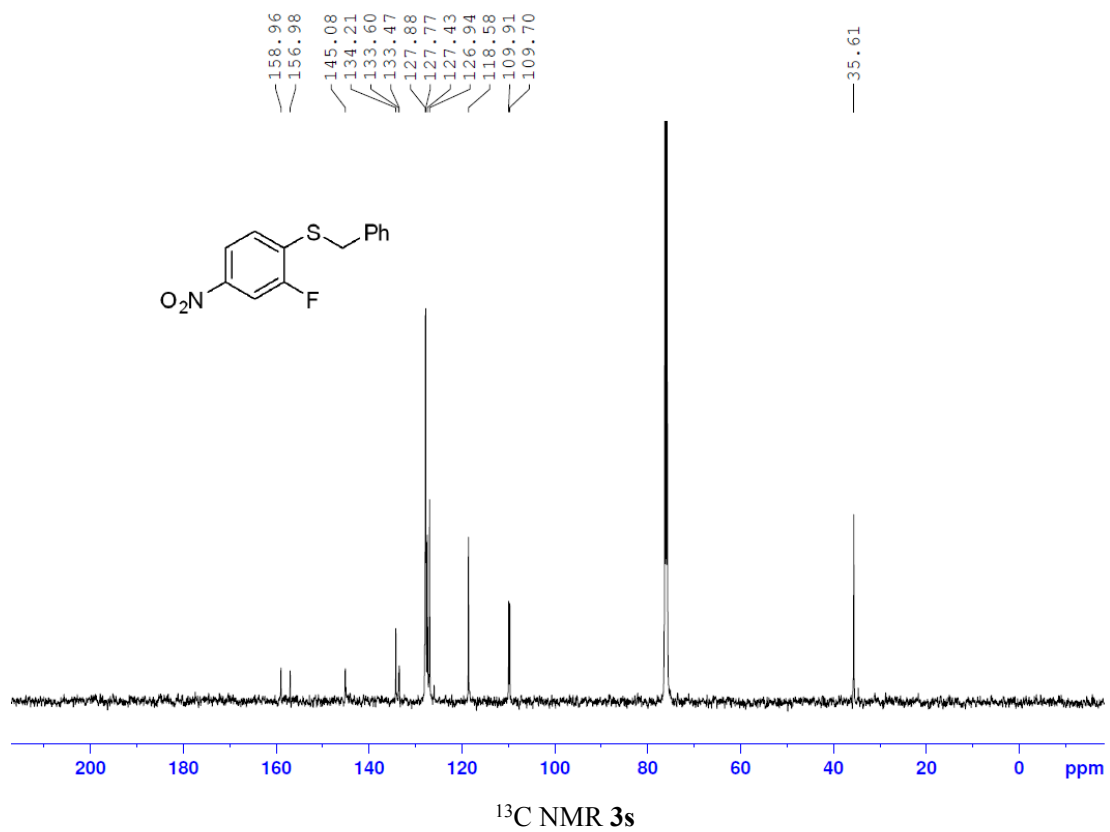

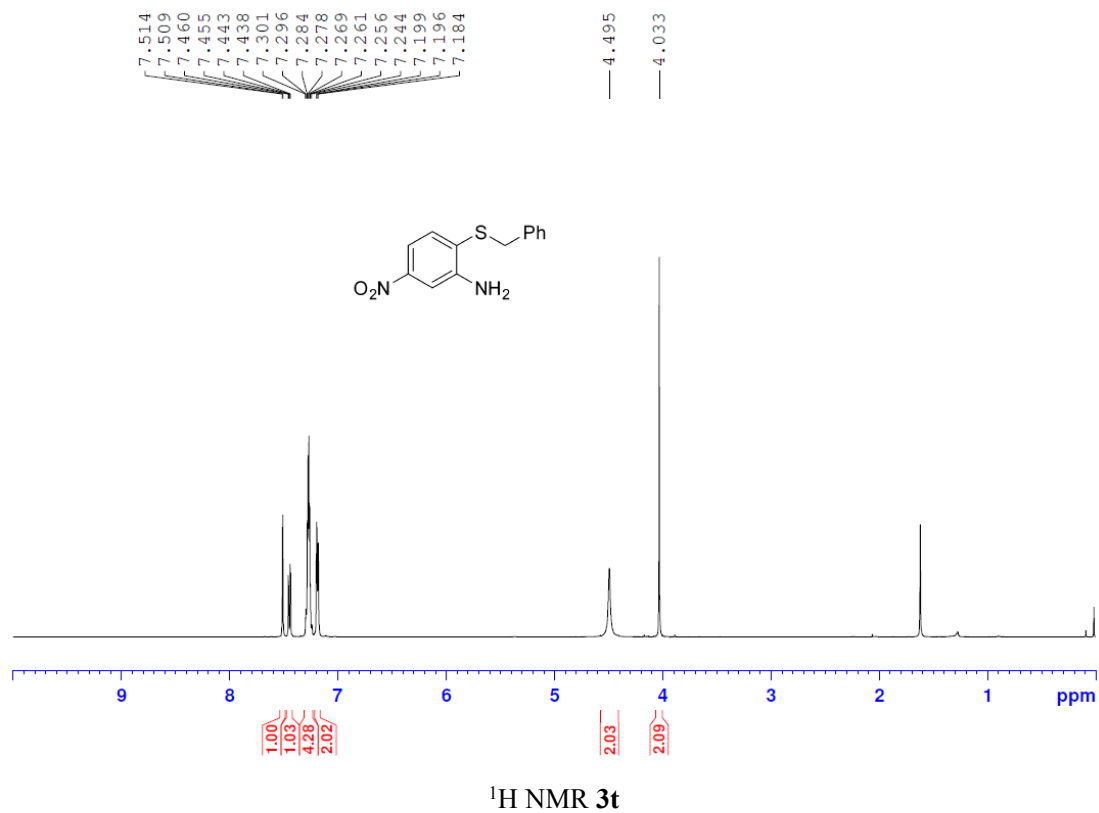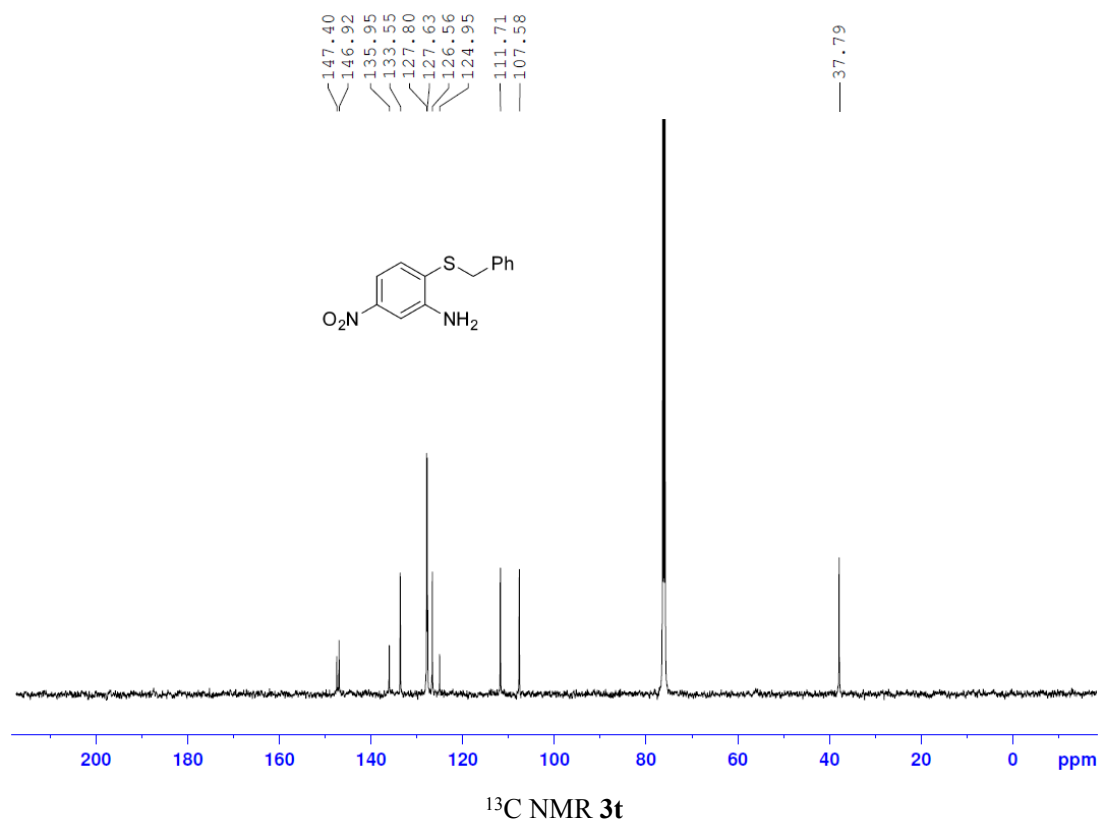

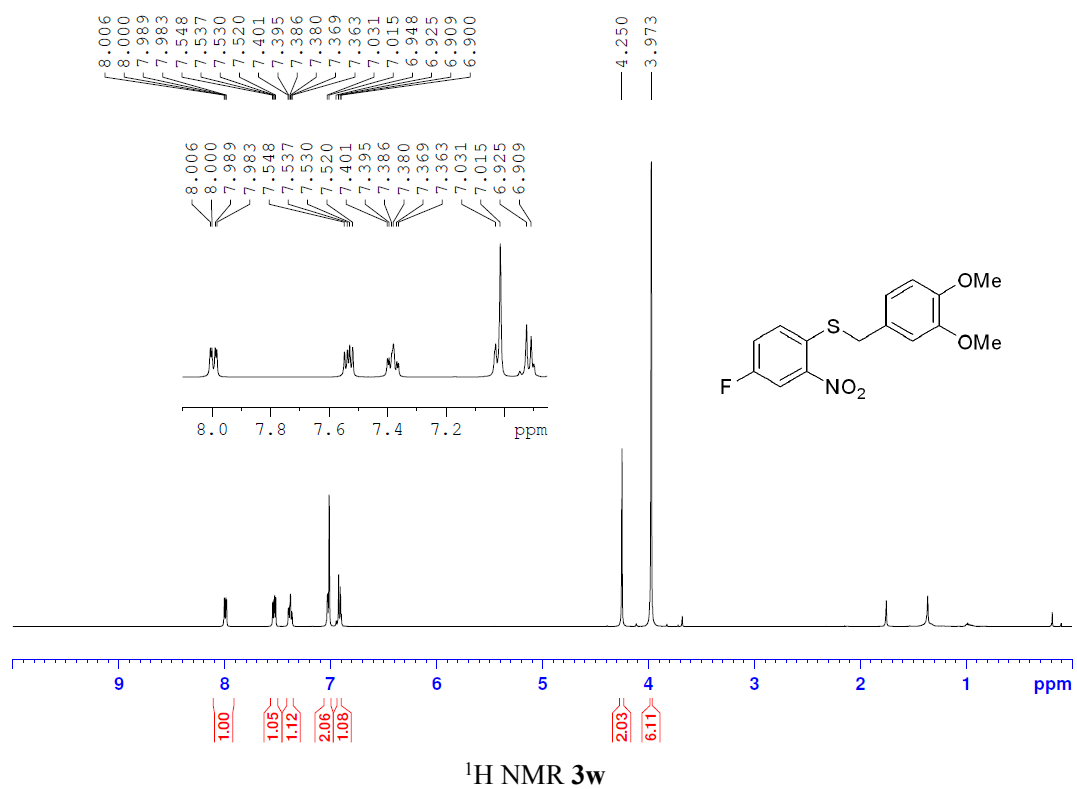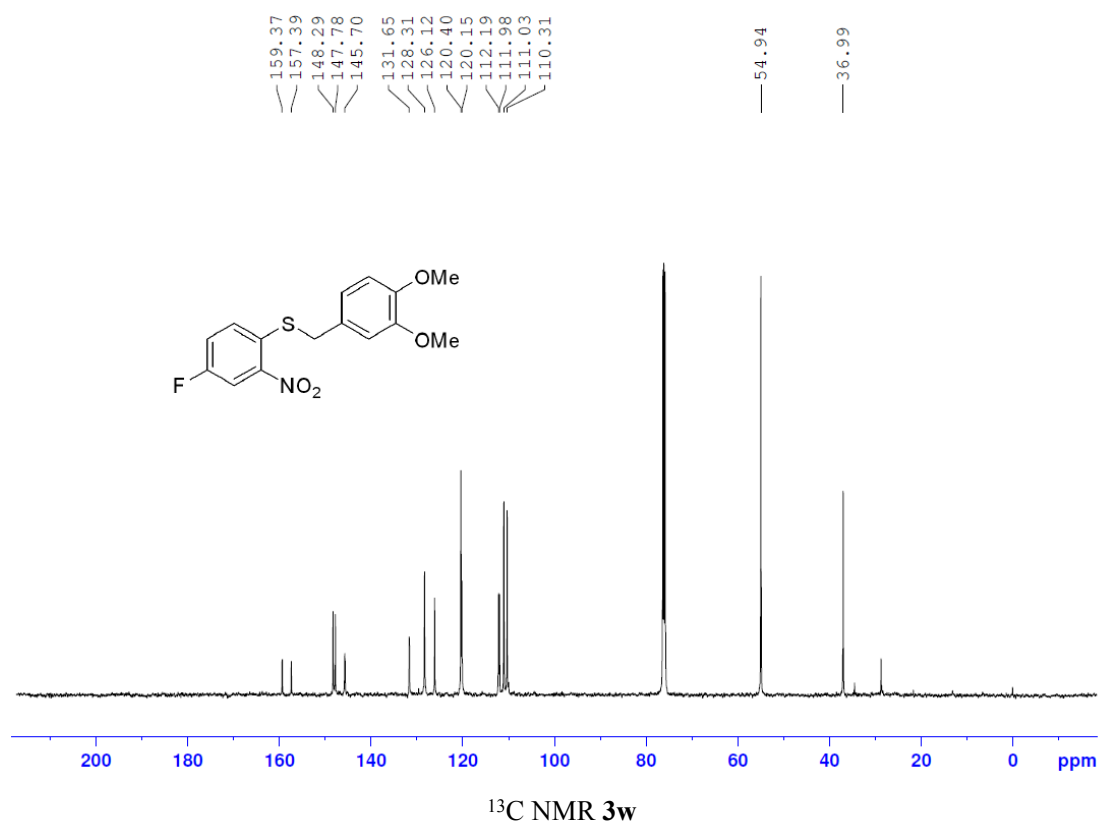



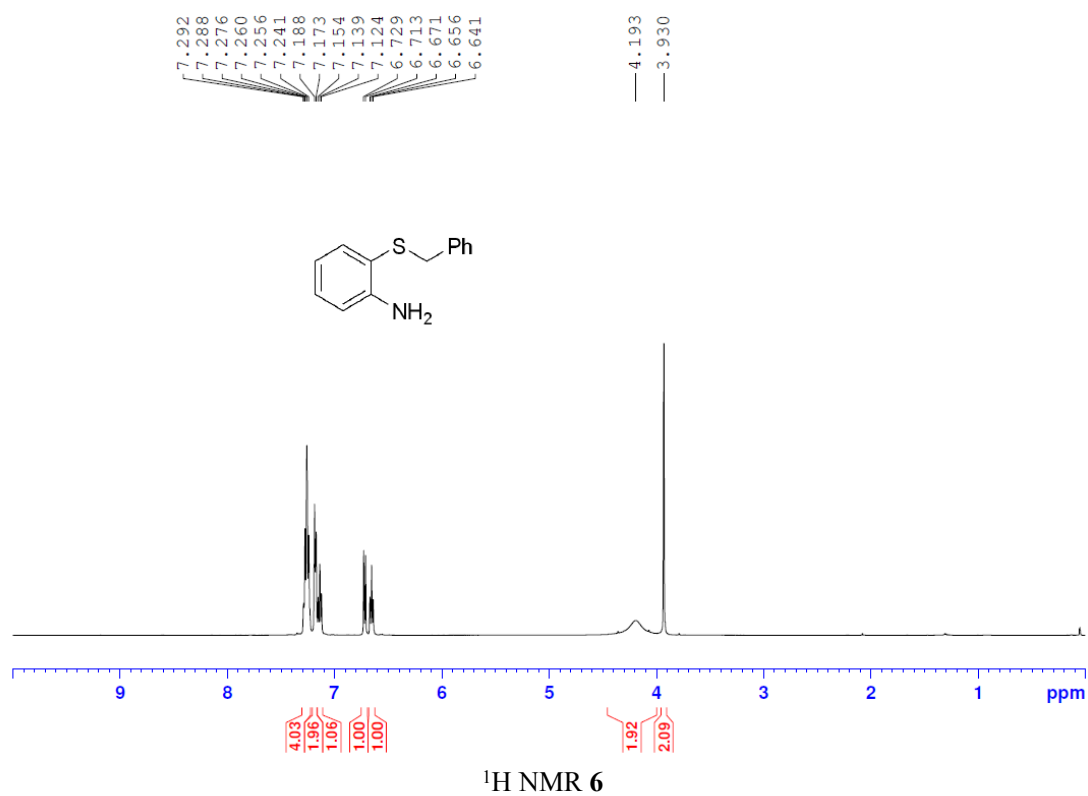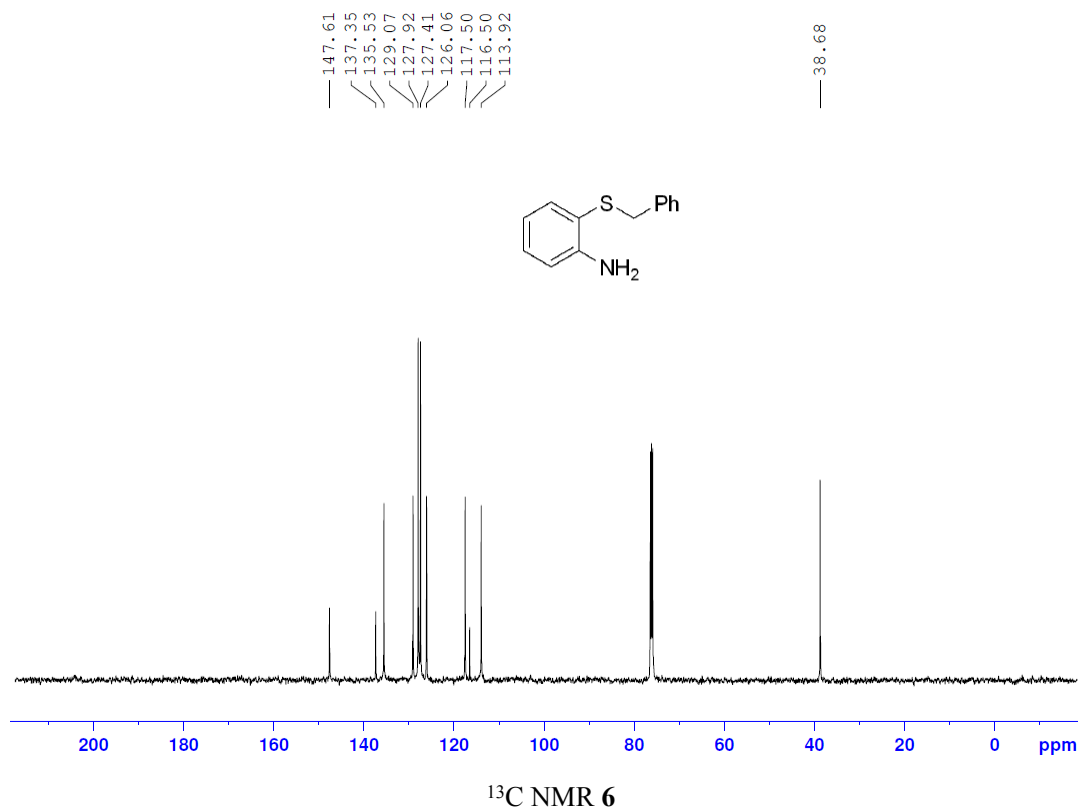

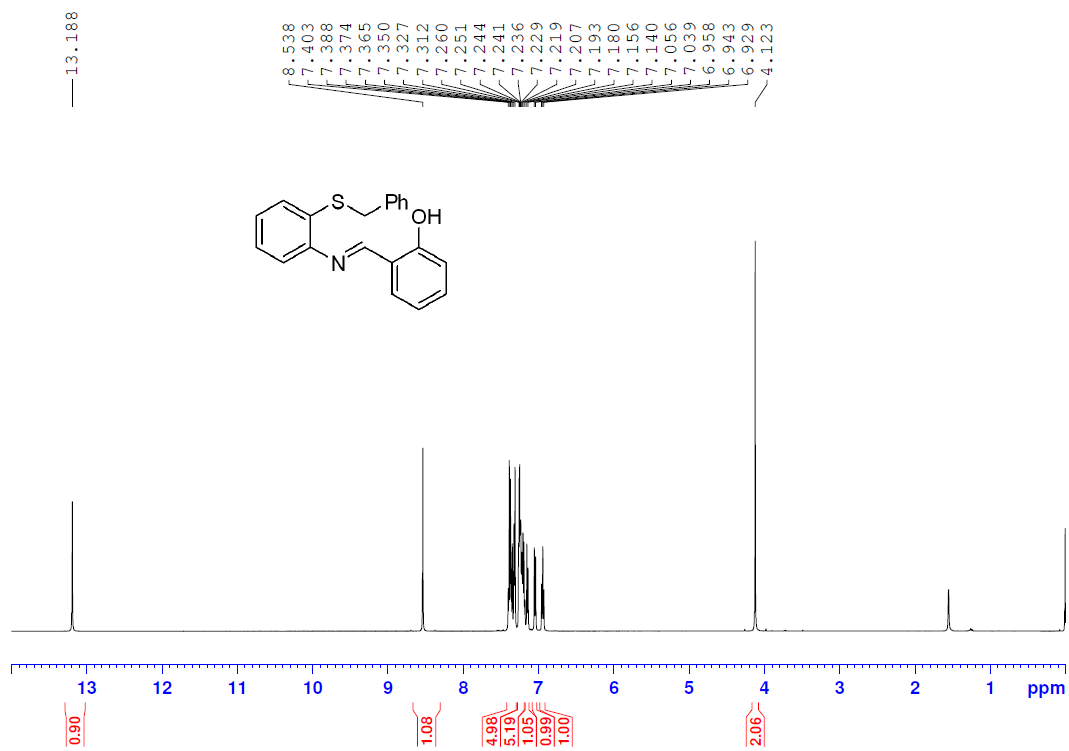<sup>1</sup>H NMR 7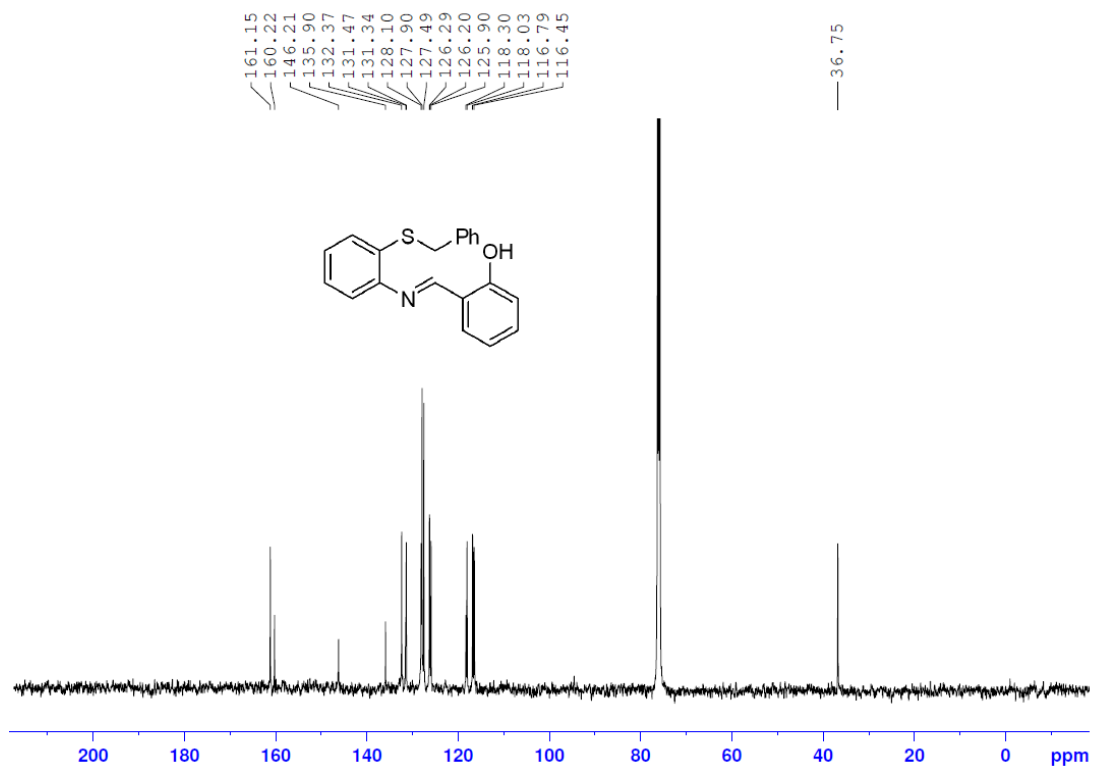<sup>13</sup>C NMR 7

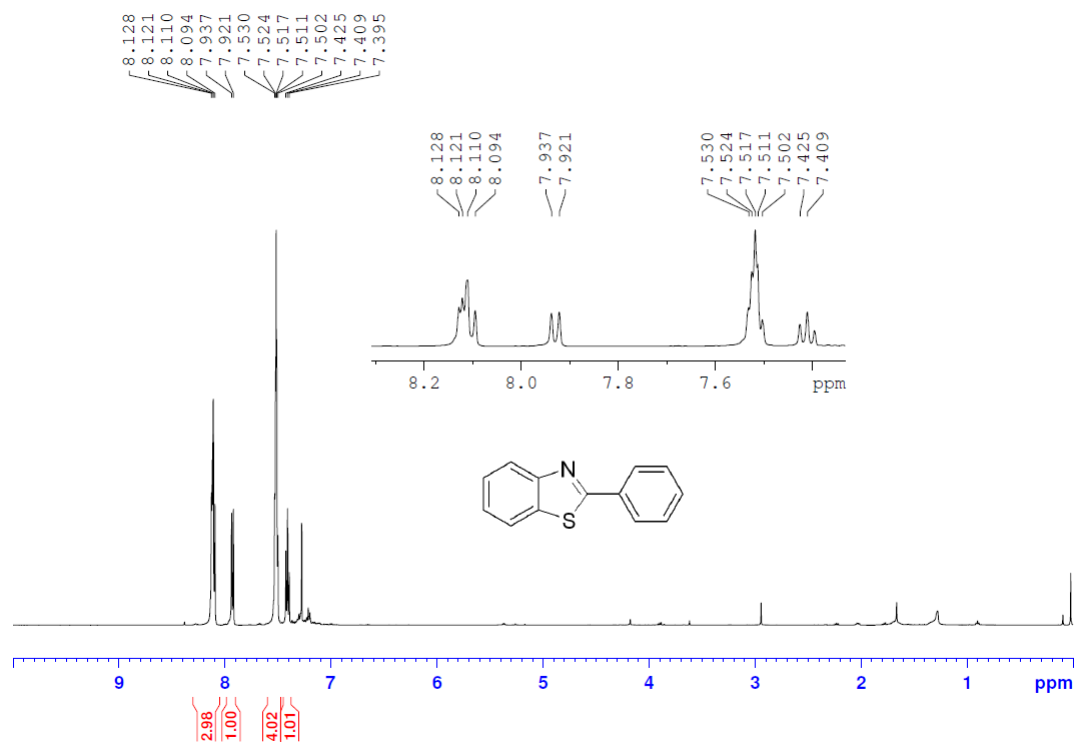<sup>1</sup>H NMR 8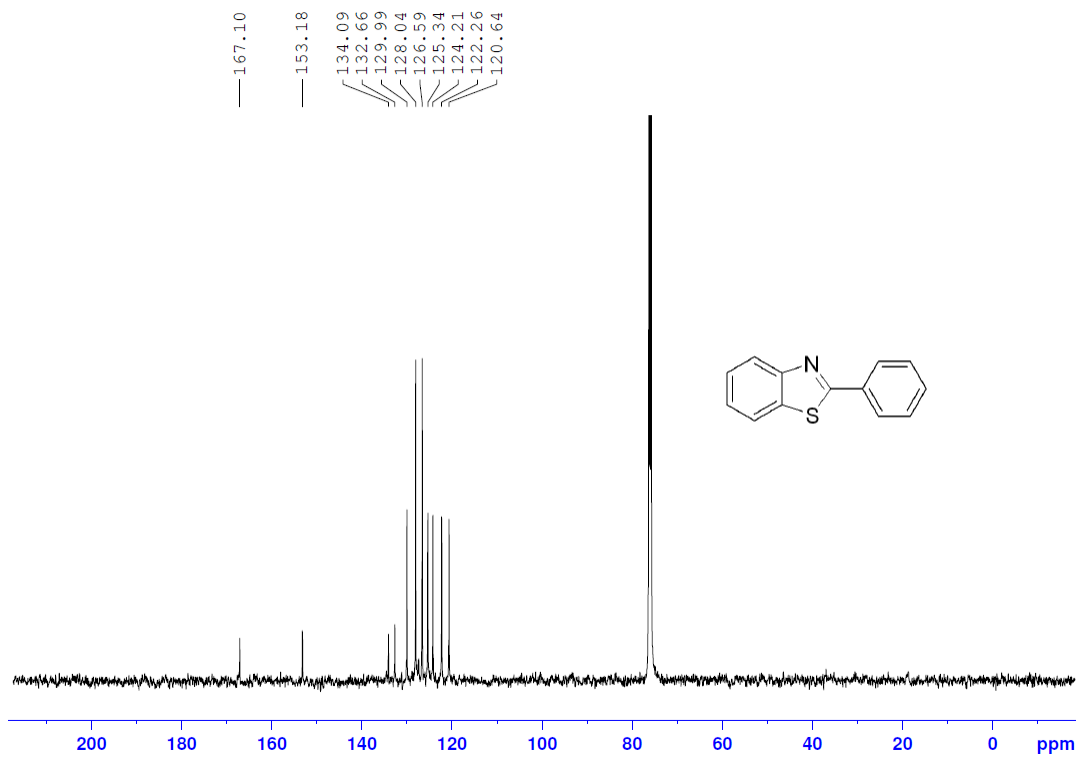<sup>13</sup>C NMR 8

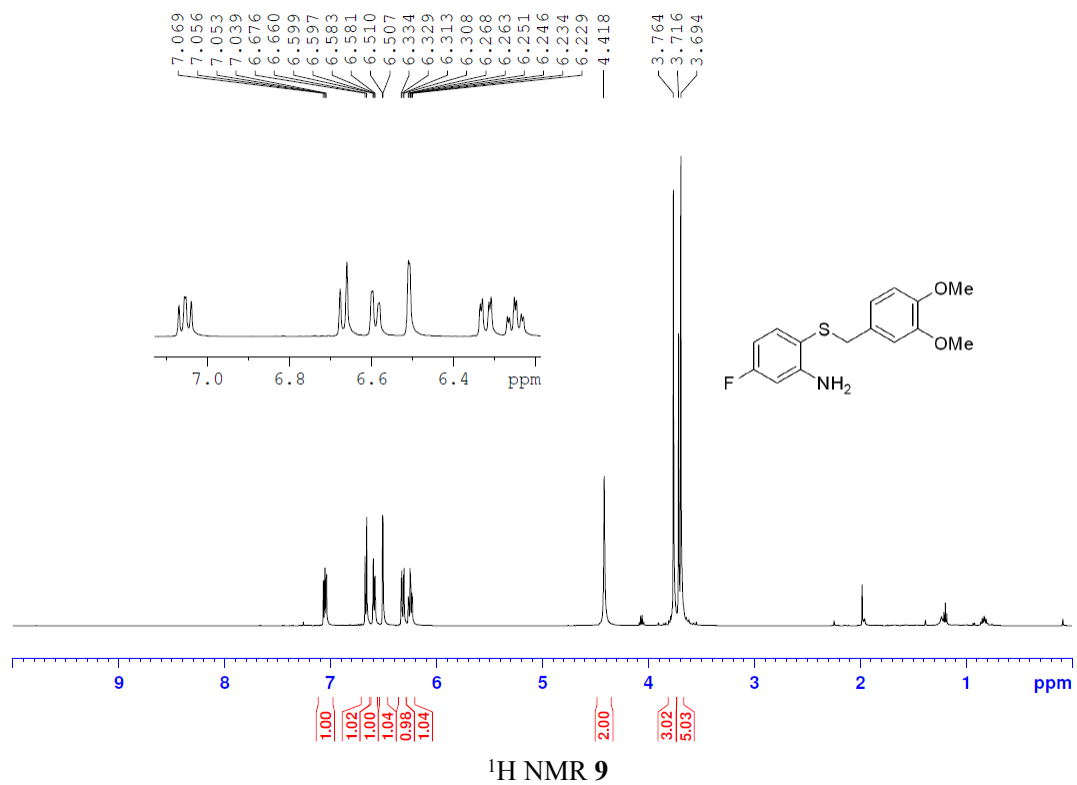<sup>1</sup>H NMR 9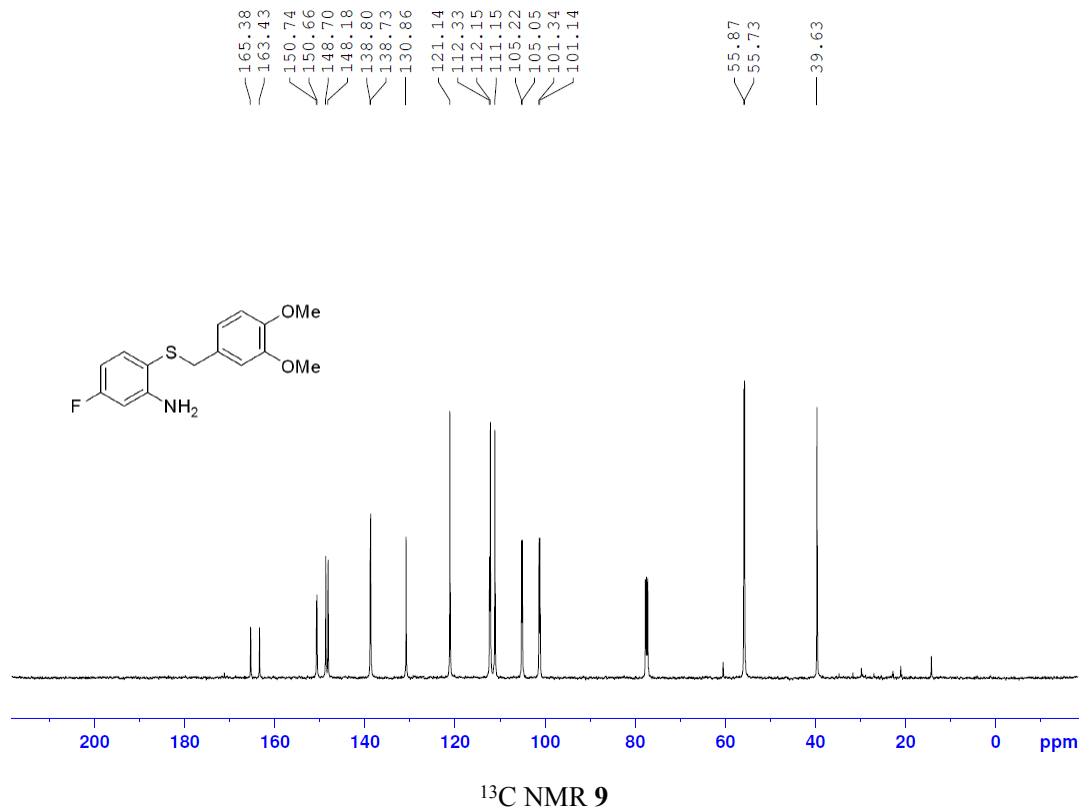<sup>13</sup>C NMR 9

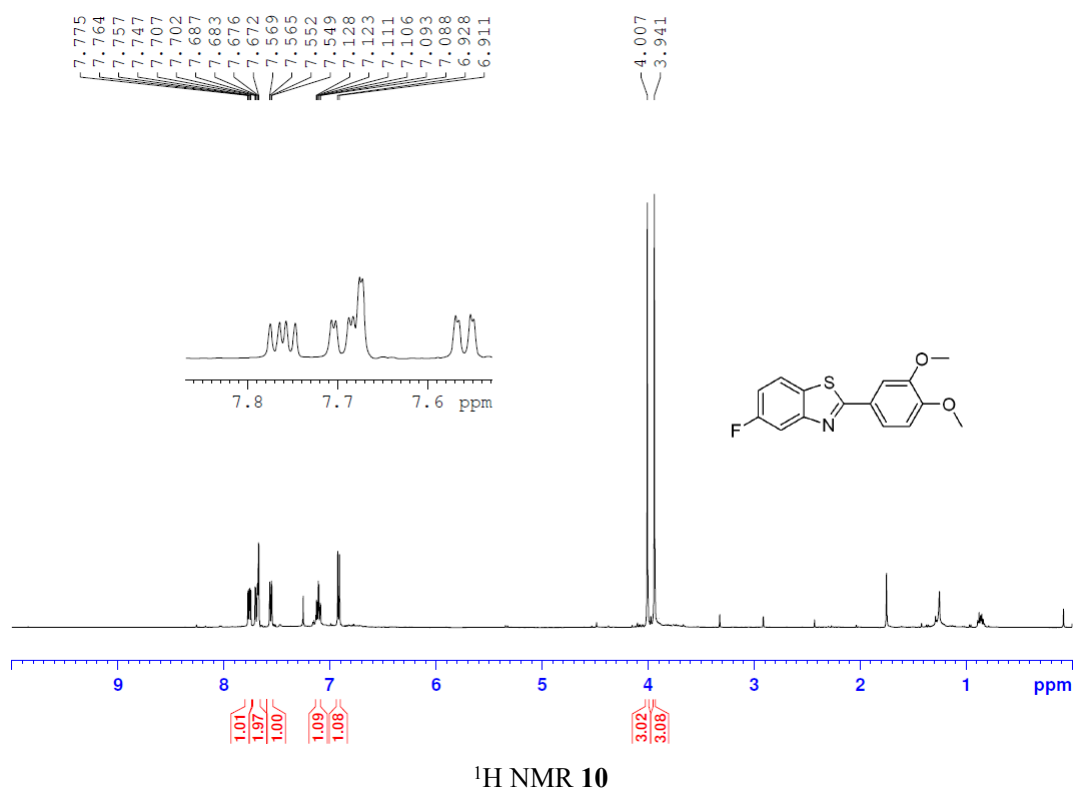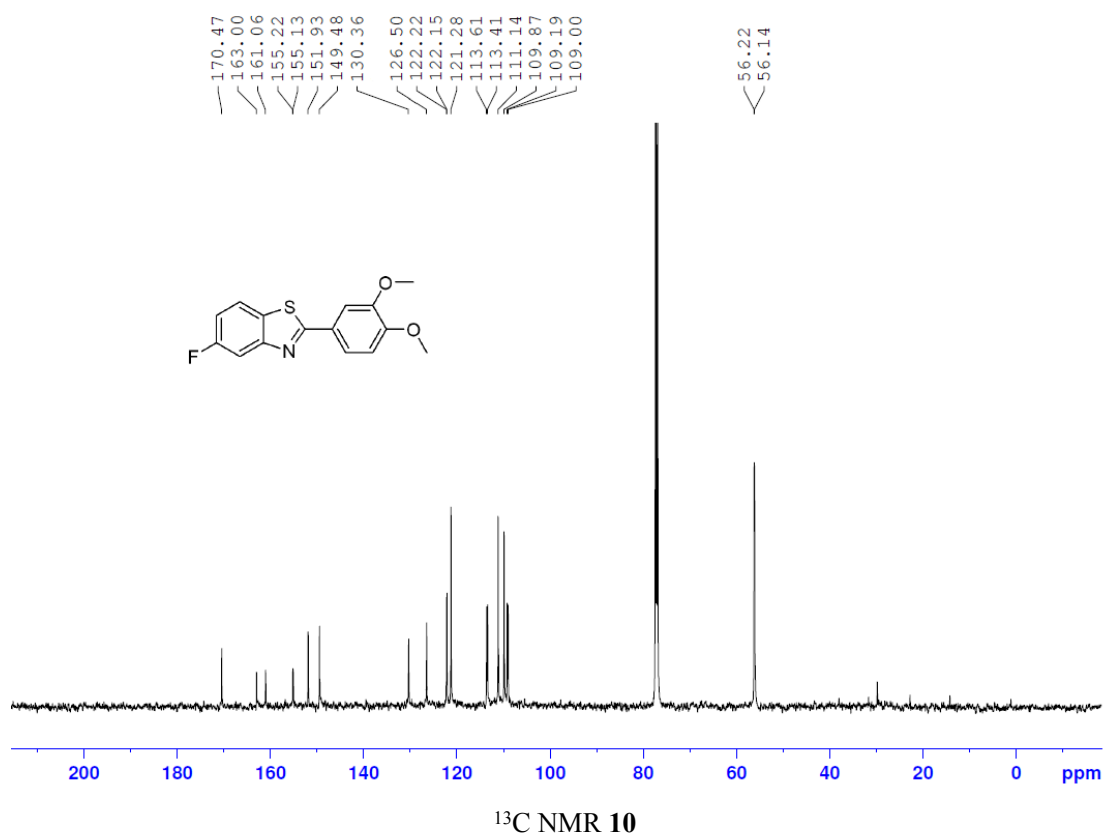

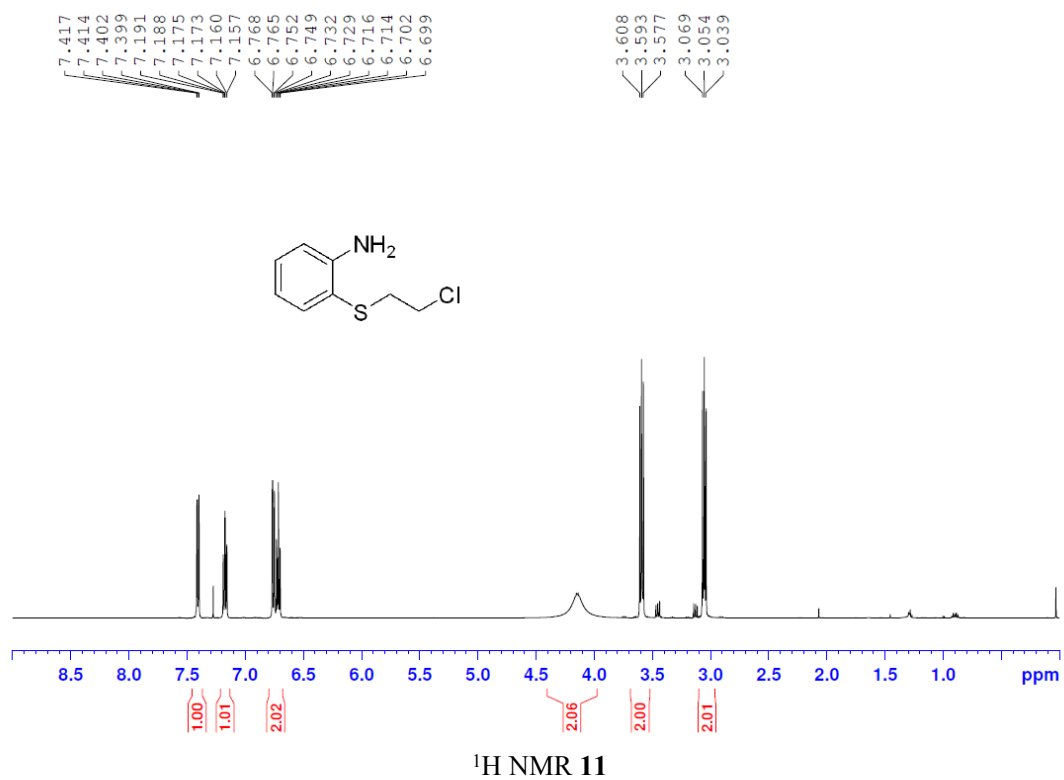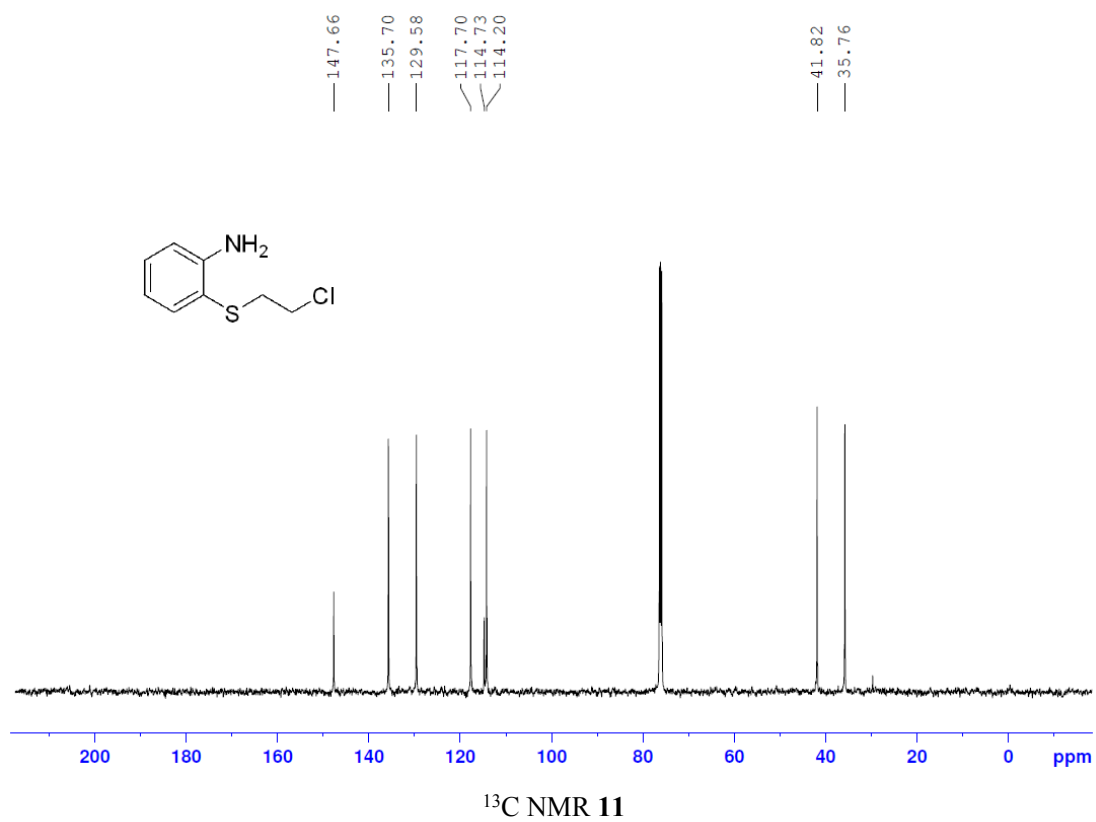

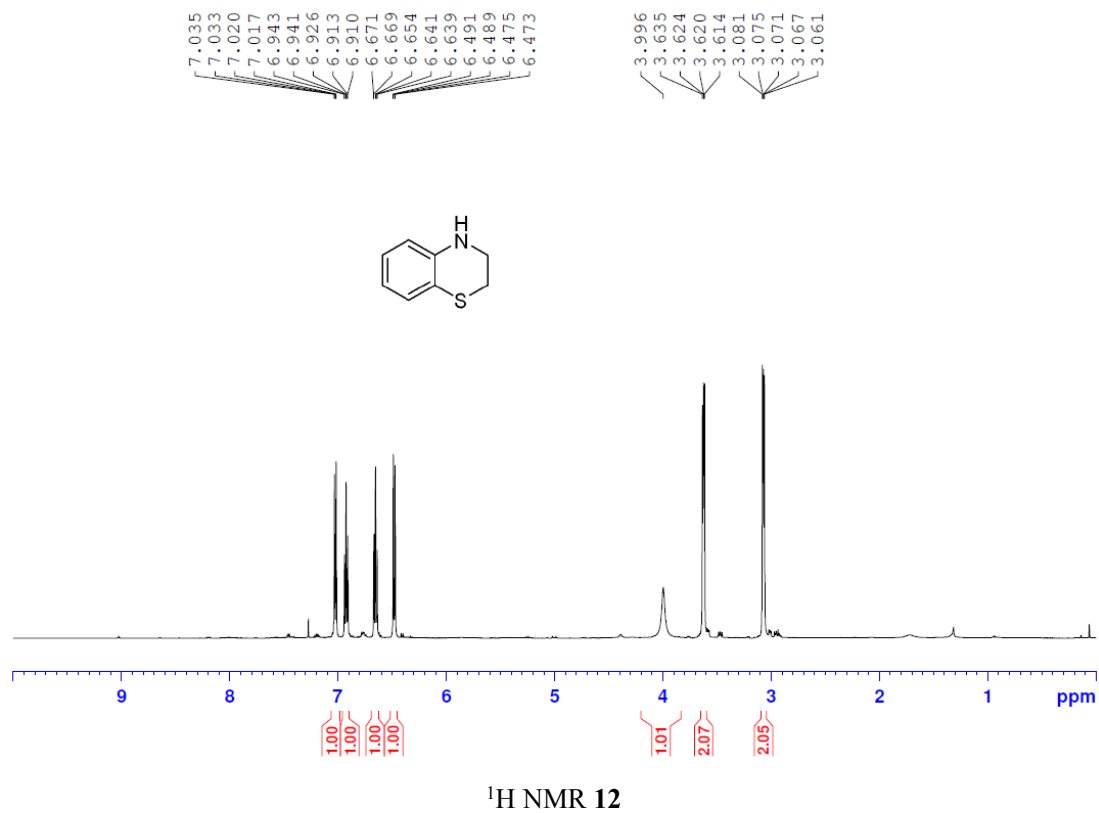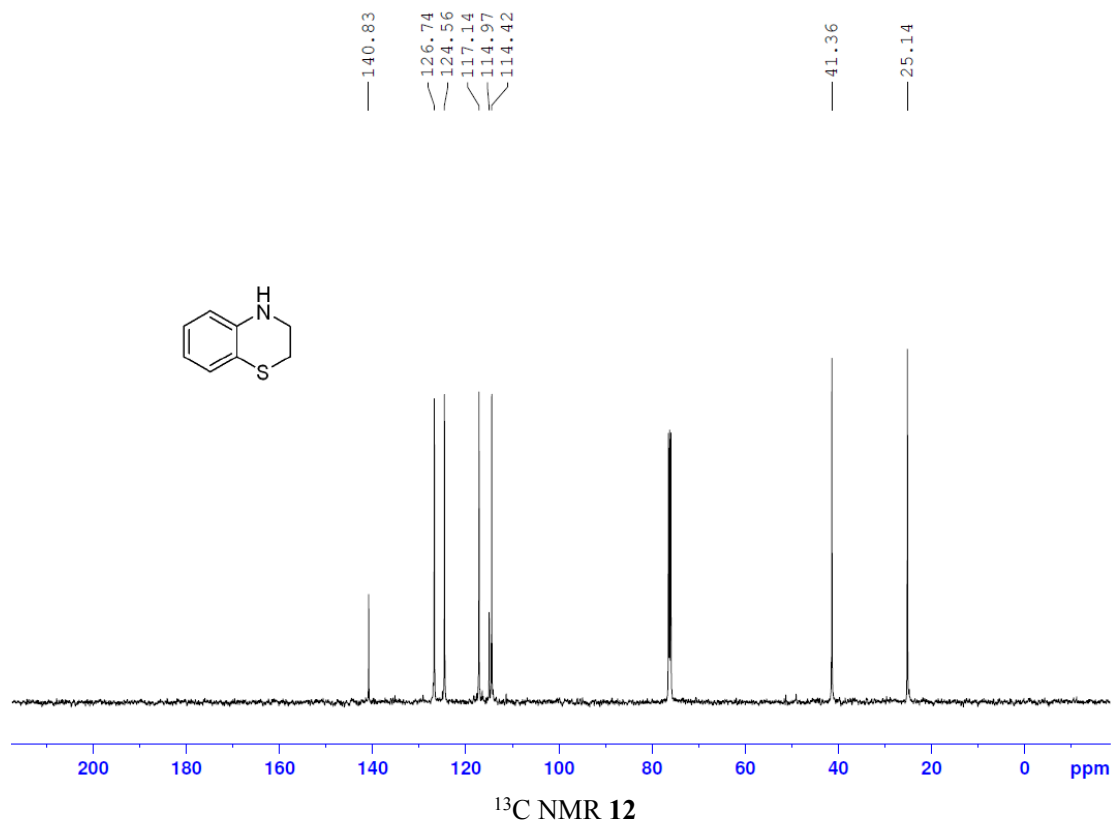

Supplement: c4ra11490f1.pdf [file c4ra11490f1.pdf]
